# Supplementary material for: α-Cyanostilbene based fluorophores: aggregation-induced enhanced emission, solvatochromism and the pH effect
Source: Royal Society of Chemistry journal article supplement (doi:10.1039/c4nj01103a), 2014-08-06
Supplement: c4nj01103a1.pdf [file c4nj01103a1.pdf]

**$\alpha$ -cyanostilbene based Fluorophores: Aggregation Induced Enhanced  
Emission, Solvatochromism and pH effect**

**Veerabhadraiah Palakollu and Sriram Kanvah\***

Department of Chemistry, Indian Institute of Technology Gandhinagar Ahmedabad 382424.  
India. E-mail:kanvah@gmail.com.

**Supporting Information**

Part 1. Absorption and emission spectra of stilbenes (1), (4), (5) and (6) in homogeneous solvents

Part 2. Emission studies in dioxane-water system for stilbenes (2), (3), (4), (5), (6); Intensity plot for stilbenes (4)-(6)

Part 3. pH dependent optical properties of stilbene (4) and its NMR interpretation

Part 4. NMR, Mass characterization of the synthesized molecules

## Part 1. Absorption and emission spectra of stilbenes (1), (4), (5) and (6) in homogeneous solvents

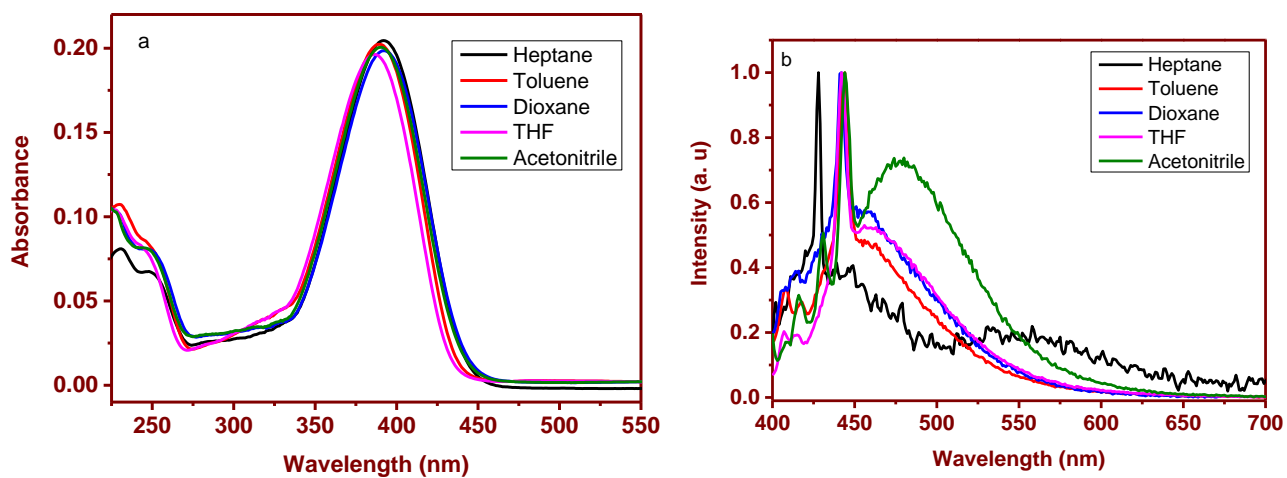

**Figure S1:** Absorption and emission spectra of stilbene (1) in homogeneous solvents (excitation wavelength is 390 nm)

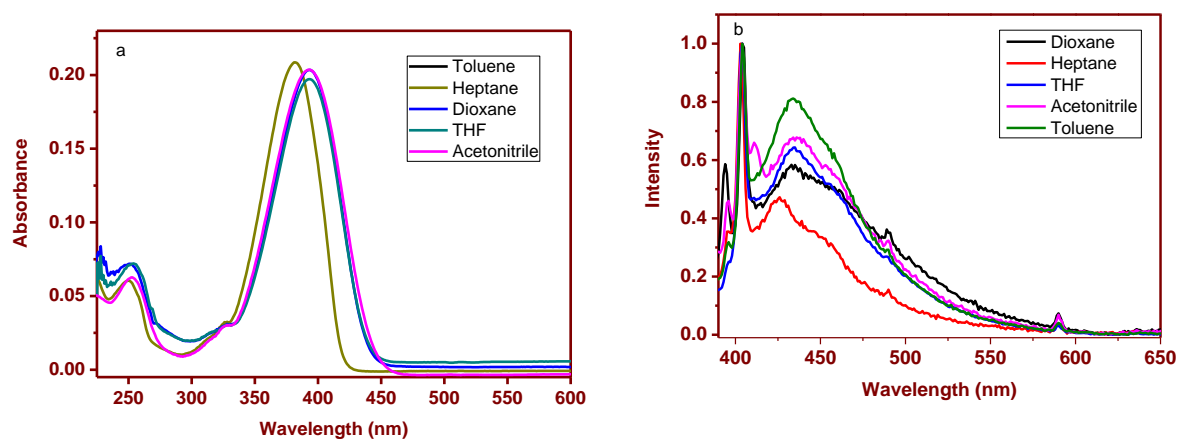

**Figure S2:** Absorption and emission spectra of stilbene (4) in homogeneous solvents (excitation wavelength is 380 nm)

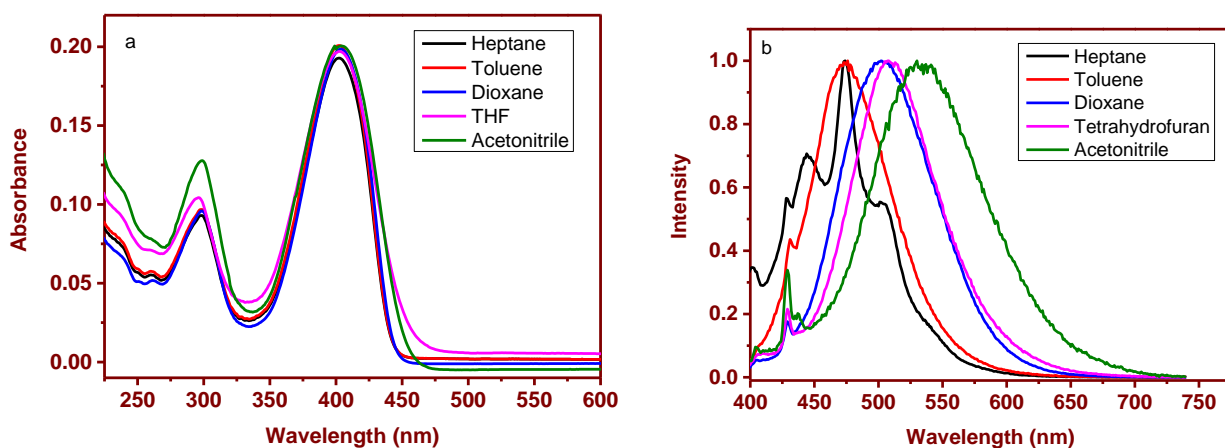

**Figure S3:** Absorption and emission spectra of stilbene (**5**) in homogeneous solvents (excitation wavelength is 395 nm)

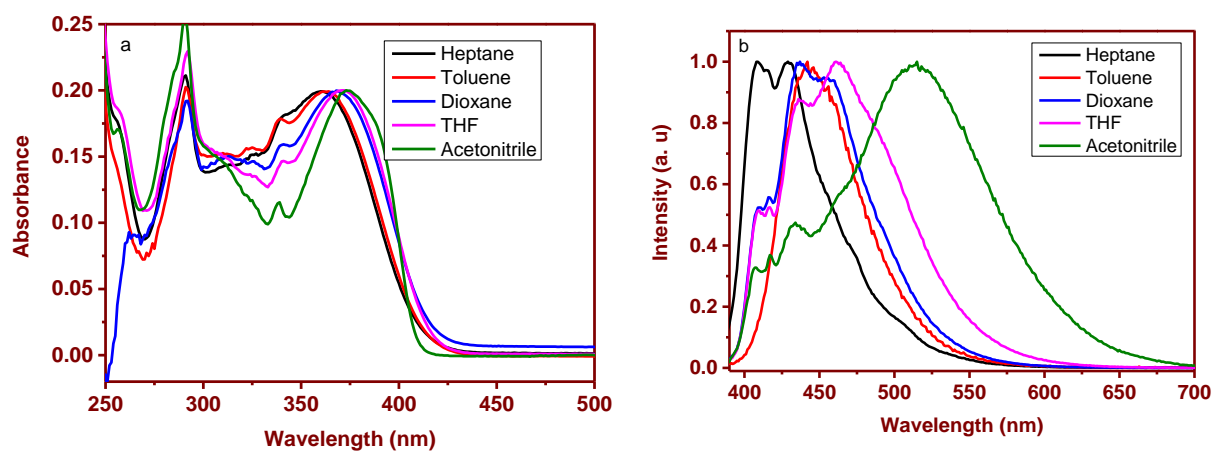

**Figure S4:** Absorption and emission spectra of stilbene (**6**) in homogeneous solvents (excitation wavelength is 365 nm)

Part 2. Emission studies in dioxane-water system for stilbenes (2), (3), (4), (5), (6);

Intensity plot for stilbenes (4)-(6)

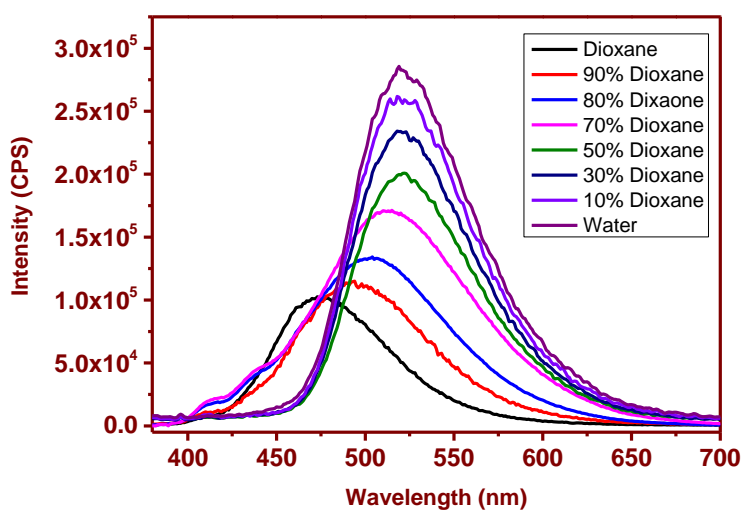

**Figure S5:** Fluorescence spectral changes of stilbene(2) with various proportions of dioxane and water (excitation wavelength is 395 nm)

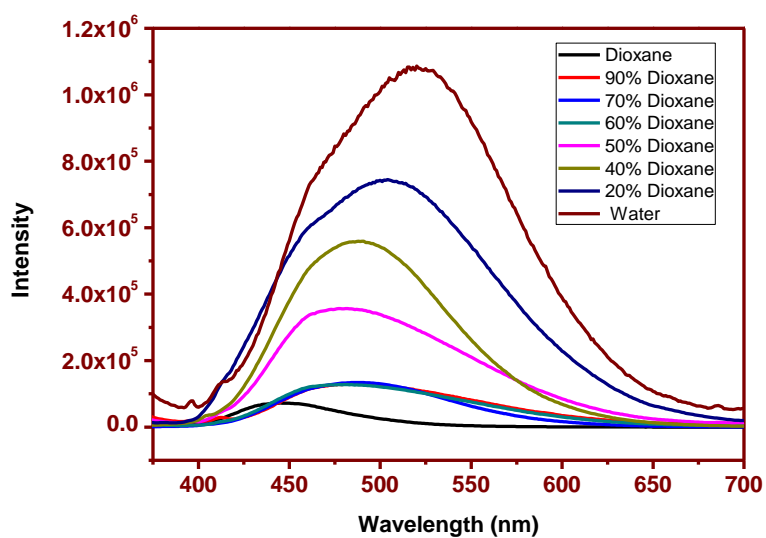

**Figure S6:** Fluorescence spectral changes of stilbene (3) with various proportions of dioxane and water (excitation wavelength is 370 nm)

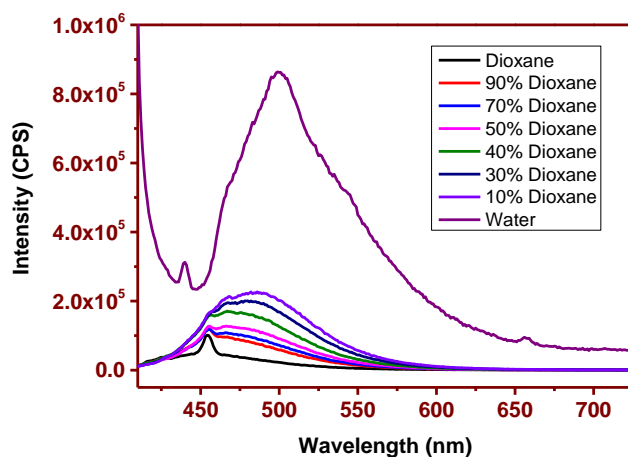

**Figure S7:** Fluorescence spectral changes of stilbene (**4**) with various proportions of dioxane and water (excitation wavelength is 390 nm)

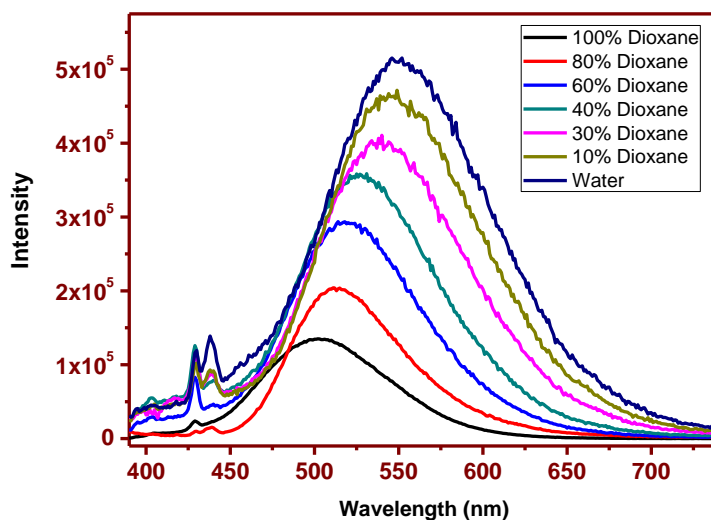

**Figure S8:** Fluorescence spectral changes of stilbene (**5**) with various proportions of dioxane and water (excitation wavelength is 400 nm)

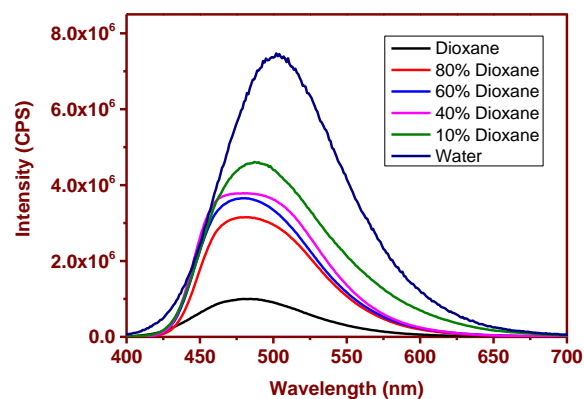

**Figure S9:** Fluorescence spectral changes of stilbene (6) with various proportions of dioxane and water (excitation wavelength is 365 nm)

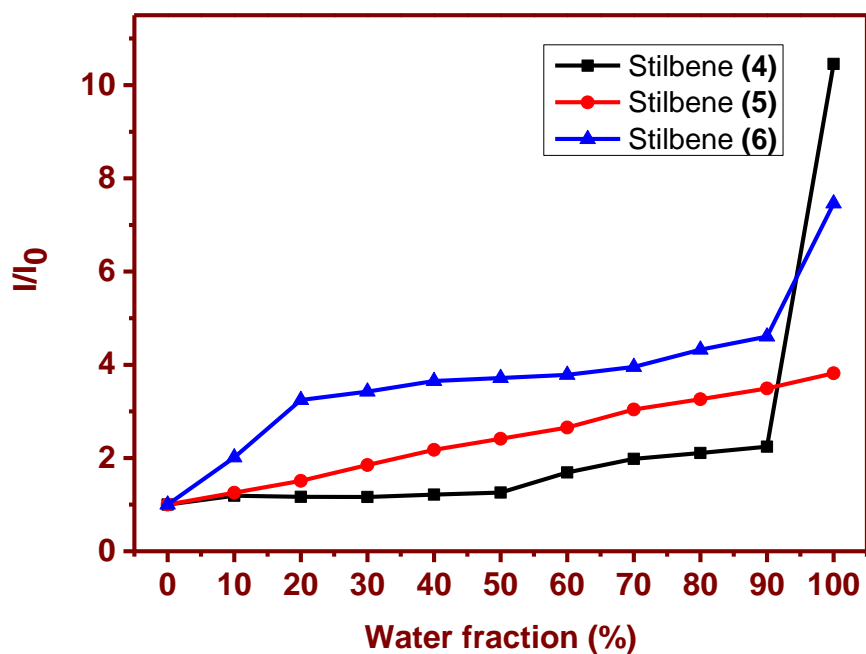

**Figure S10:** A plot of  $I/I_0$  vs water fraction of stilbenes (4)-(6)

**Table S1:** Fluorescence quantum yields of stilbenes in dioxane and water

| Molecule | Dioxane | Water | Molecule | Dioxane | Water |
|----------|---------|-------|----------|---------|-------|
| (1)      | 0.056   | 0.181 | (4)      | 0.0089  | 0.124 |
| (2)      | 0.125   | 0.154 | (5)      | 0.0524  | 0.110 |
| (3)      | 0.127   | 0.160 | (6)      | 0.086   | 0.121 |

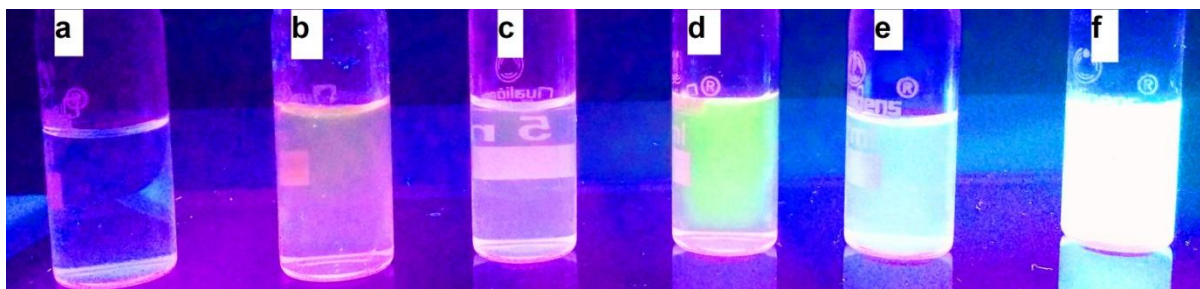

**Figure S11:** Colors of stilbenes (black background) in water and dioxane using hand-held UV lamp. (a), (b), (c) are in dioxane and (d), (e), (f) are in water for stilbenes (1), (2), (3) respectively. (The sample concentration is of the order  $10^{-4}$ M).

### Part 3. pH dependent optical properties of stilbene (4) and its NMR interpretation

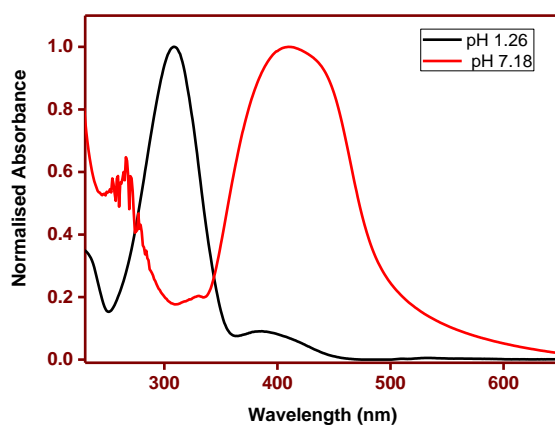

**Figure S12:** Absorption spectra stilbene (4) recorded at various pH 1.26 and 7.18

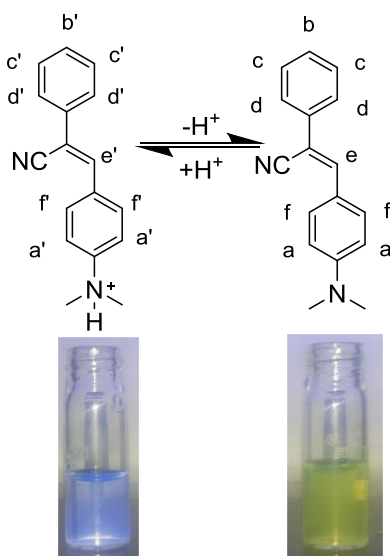

**Figure S13:** Switching mechanism of stilbene (4) under various pH conditions and corresponding colors under UV lighting conditions. 1A- acidic species, 1-neutral species

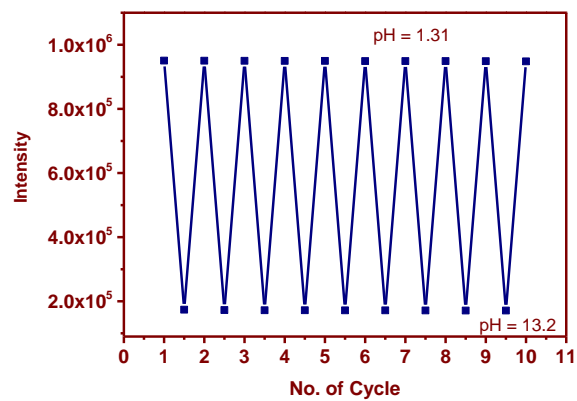

**Figure S14:** Acid-base reversibility cycle by fluorescence intensity for stilbene (3)

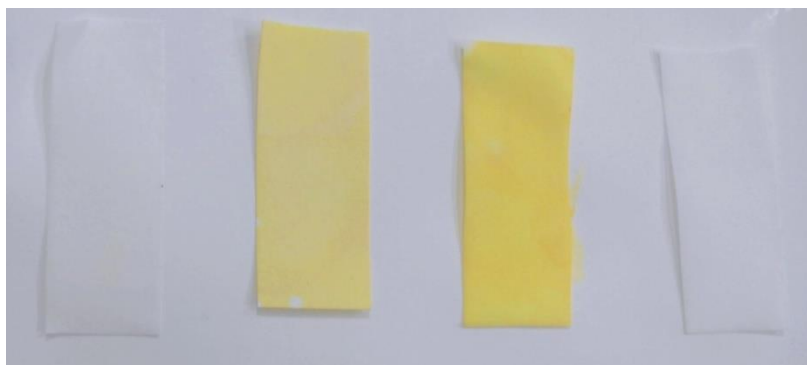

**Figure S15:** Dye coated filter paper in acidic, neutral, basic and acidic (reversibility from basic medium) (from left to right)



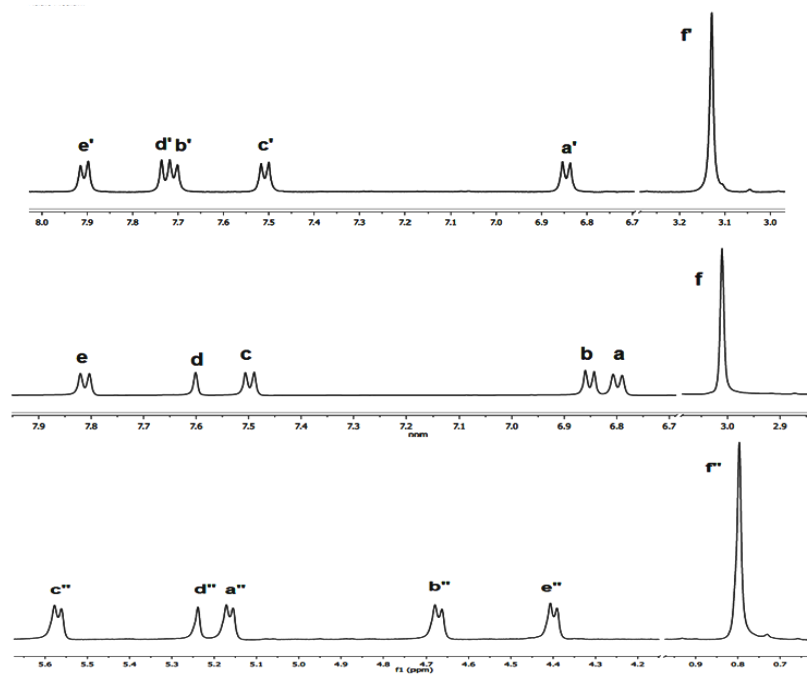

**Figure S16:**  $^1\text{H}$  NMR spectra under various pH conditions in  $\text{DMSO}(D_6)\text{-D}_2\text{O}$ . **1A:** acidic medium, **1:** neutral medium, **1B:** basic medium (solvent peaks were discarded for clarity).

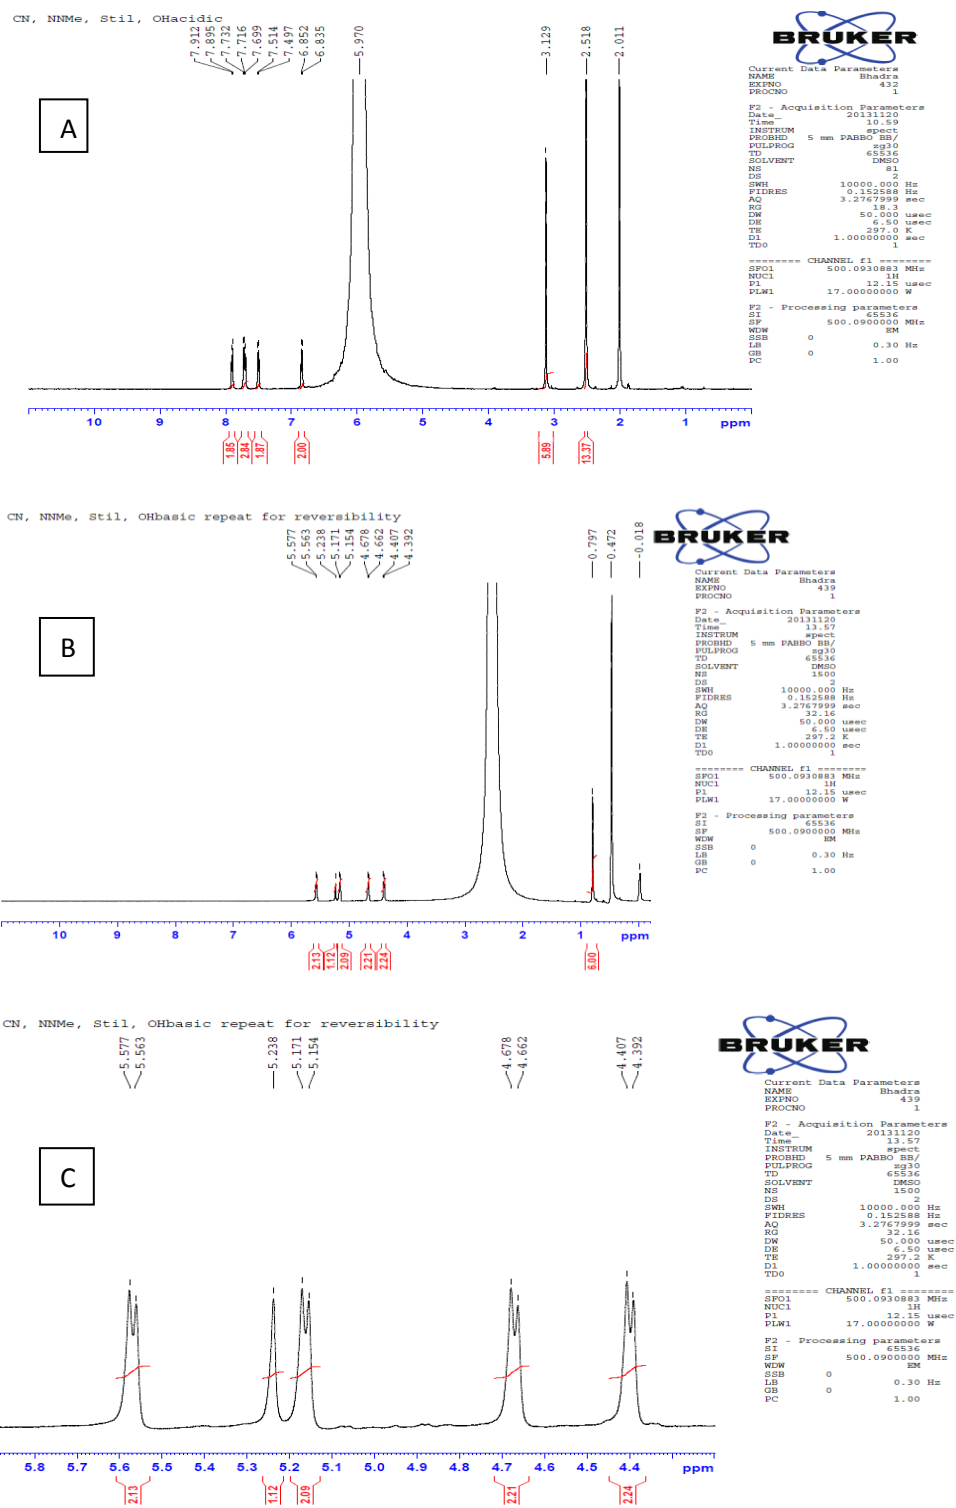

**Figure S17:** Examination of acid-base reversibility for stilbene (**1**) by NMR spectroscopy. **A**): **1** in Acidic medium. **B**. To the NMR tube of **1** in acidic medium, a solution 1M NaOH is added and the resulting spectrum is shown. **C**: Expanded spectra of **1** in basic medium. **B** (&C) is identical to that obtained in the basic medium.

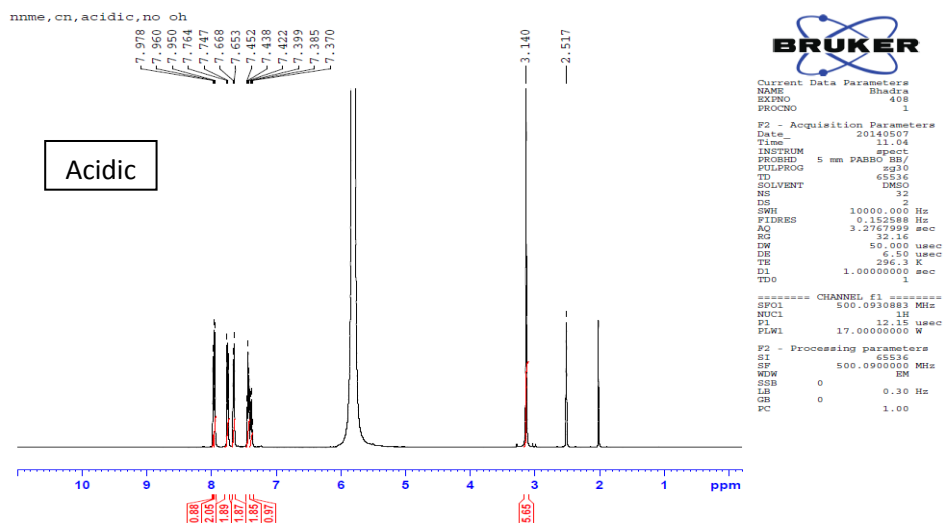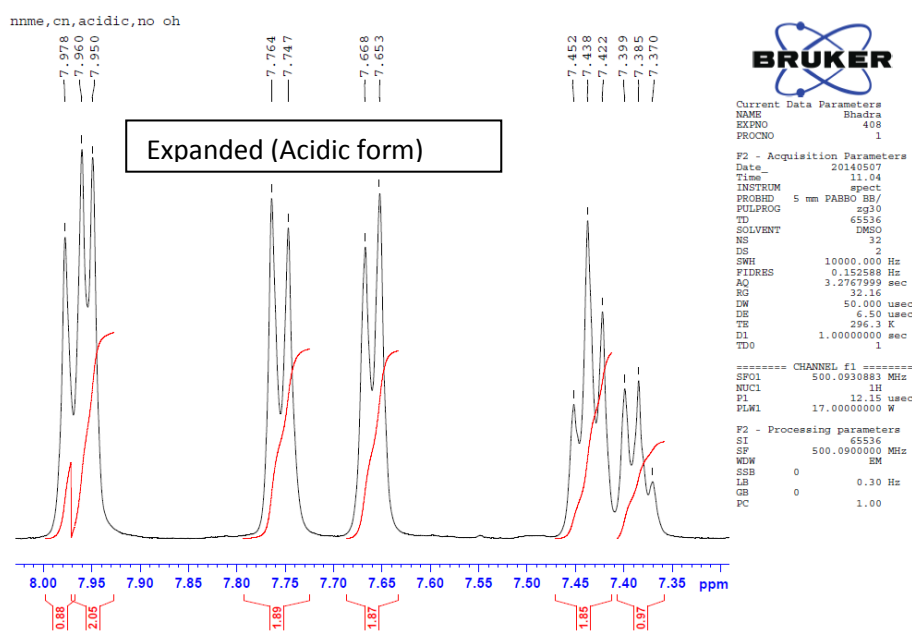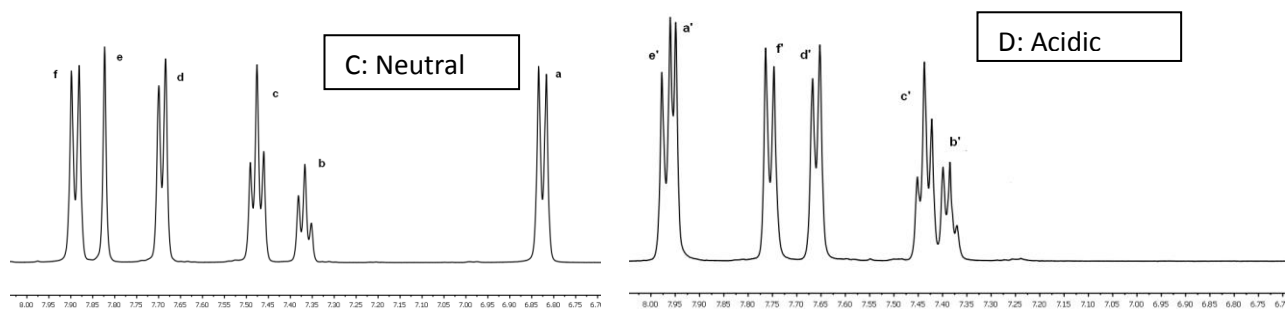

**Figure S18:**  $^1\text{H}$  NMR spectra of stilbene (**4**) under acidic pH conditions in DMSO( $d_6$ ). Comparison is provided with NMR obtained neutral (C) and in acidic (D) medium. (Solvent peaks were discarded for clarity)

**Table S2: pH dependent optical properties of stilbenes (4)-(6)**

| Sample | pH    | $\lambda_a$<br>(nm) | $\lambda_f$<br>(nm) | $\phi_f$ |
|--------|-------|---------------------|---------------------|----------|
| (4)    | 1.26  | 328                 | 391                 | 0.061    |
|        | 7.18  | 410                 | 499                 | 0.124    |
|        | 13.02 | 409                 | 498                 | 0.121    |
| (5)    | 1.26  | 403                 | 548                 | 0.109    |
|        | 7.18  | 405                 | 550                 | 0.110    |
|        | 13.02 | 405                 | 551                 | 0.110    |
| (6)    | 1.26  | 376                 | 500                 | 0.122    |
|        | 7.18  | 378                 | 502                 | 0.121    |
|        | 13.02 | 377                 | 502                 | 0.121    |

**Part 4. NMR, Mass characterization of the synthesized molecules**

**<sup>1</sup>H NMR Spectrum of 4-(cyanomethyl)phenyl acetate (8)**

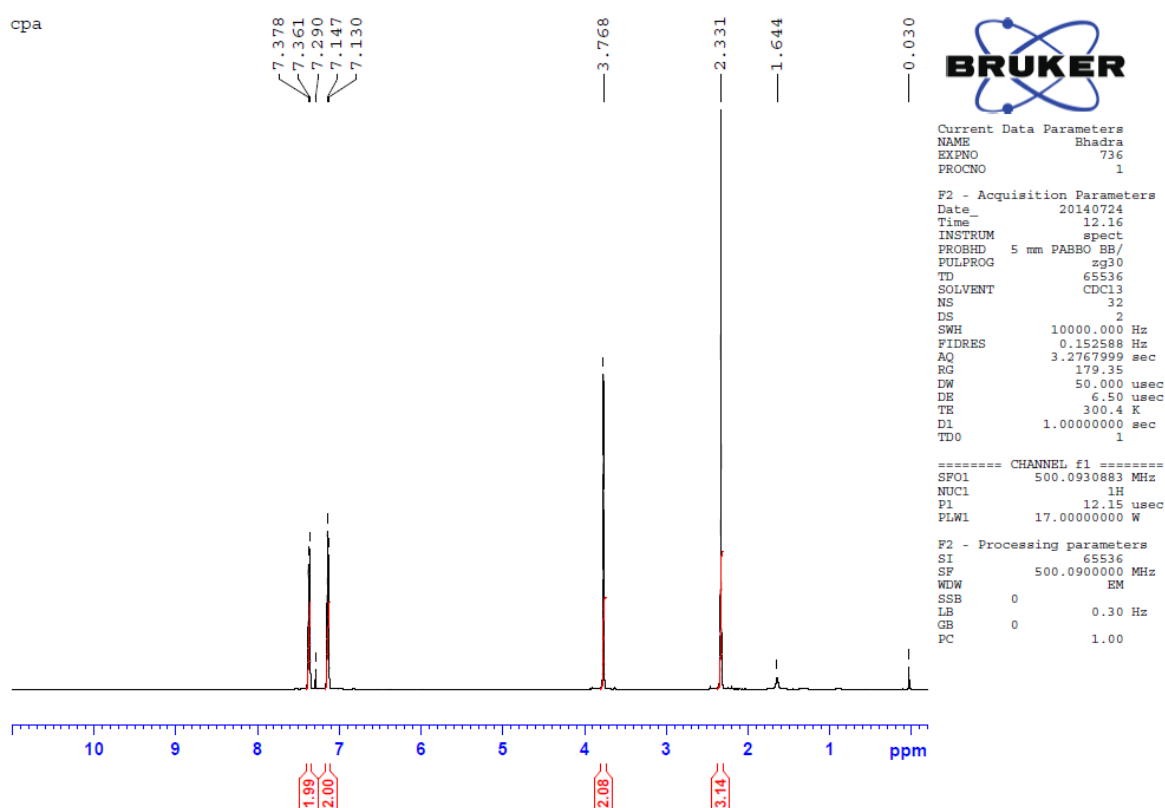

cpa

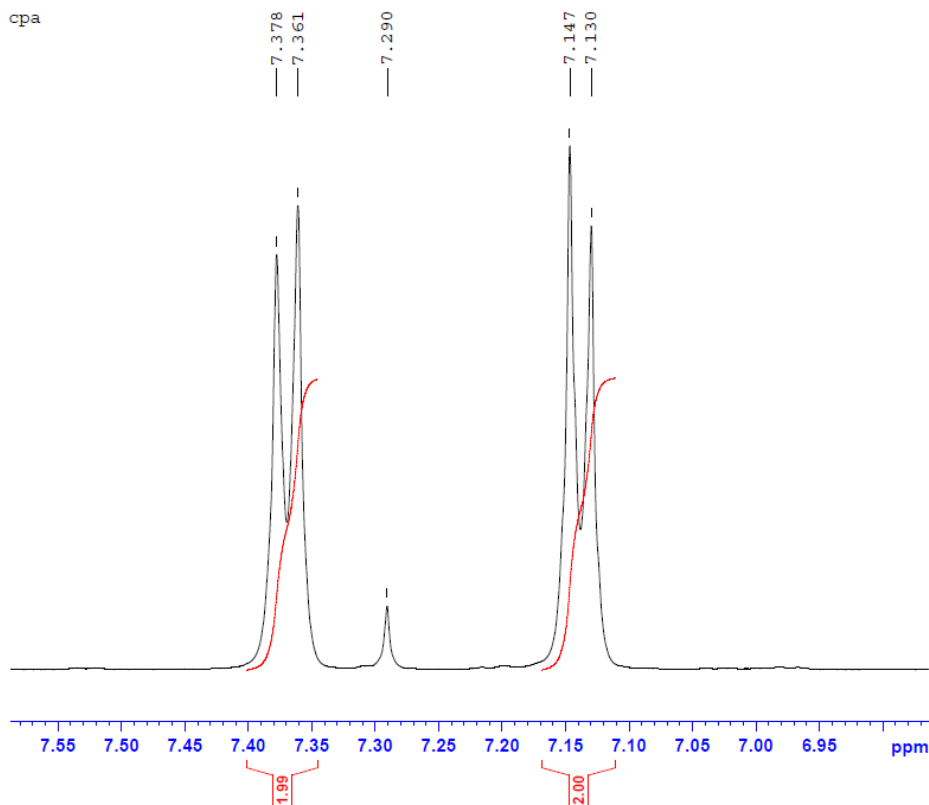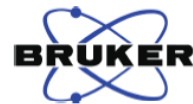

Current Data Parameters  
 NAME Bhadra  
 EXPNO 736  
 PROCNO 1

F2 - Acquisition Parameters  
 Date\_ 20140724  
 Time 12.16  
 INSTRUM spect  
 PROBHD 5 mm PABBO BB/  
 PULPROG zg30  
 TD 65536  
 SOLVENT CDCl3  
 NS 32  
 DS 2  
 SWH 10000.000 Hz  
 FIDRES 0.152588 Hz  
 AQ 3.2767999 sec  
 RG 179.35  
 DW 50.000 usec  
 DE 6.50 usec  
 TE 300.4 K  
 D1 1.0000000 sec  
 TDO 1

==== CHANNEL f1 =====  
 SFO1 500.0930893 MHz  
 NUC1 1H  
 P1 12.15 usec  
 PLW1 17.00000000 W

F2 - Processing parameters  
 SI 65536  
 SF 500.0900000 MHz  
 WDW EM  
 SSB 0  
 LB 0.30 Hz  
 GB 0  
 PC 1.00

### <sup>13</sup>C NMR Spectrum of 4-(cyanomethyl)phenyl acetate (8)

cpa

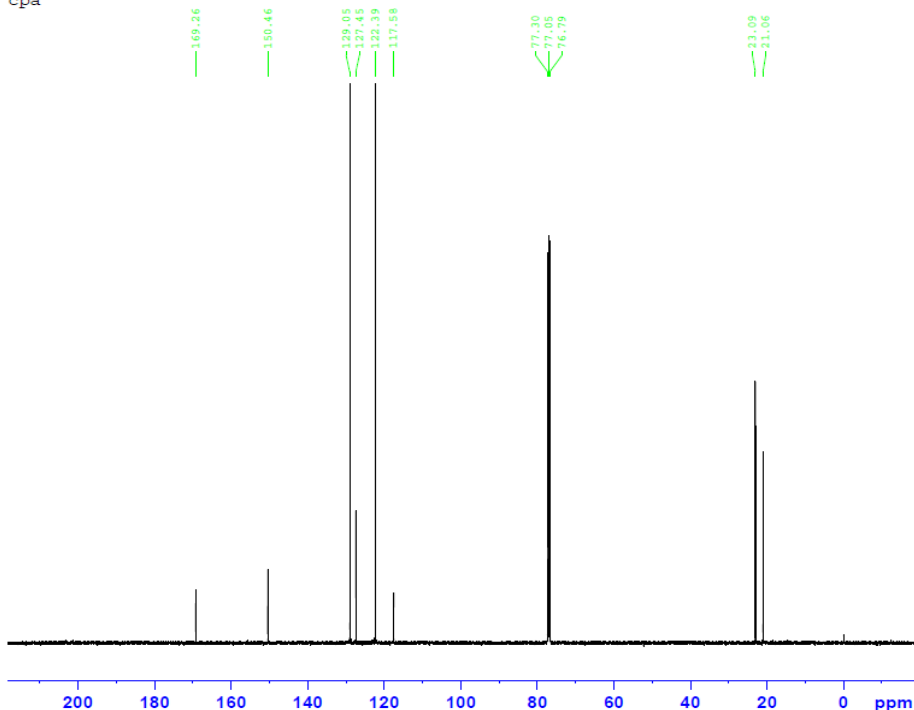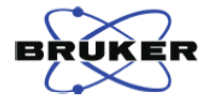

Current Data Parameters  
 NAME Bhadra  
 EXPNO 737  
 PROCNO 1

F2 - Acquisition Parameters  
 Date\_ 20140724  
 Time 12.20  
 INSTRUM spect  
 PROBHD 5 mm PABBO BB/  
 PULPROG zgpg30  
 TD 65536  
 SOLVENT CDCl3  
 NS 2000  
 DS 4  
 SWH 29761.904 Hz  
 FIDRES 0.454131 Hz  
 AQ 1.1010048 sec  
 RG 200.08  
 DW 16.800 usec  
 DE 6.50 usec  
 TE 301.0 K  
 D1 2.00000000 sec  
 D11 0.03300000 sec  
 TDO 1

==== CHANNEL f1 =====  
 SFO1 125.7603047 MHz  
 NUC1 13C  
 P1 8.90 usec  
 PLW1 29.00000000 W

==== CHANNEL f2 =====  
 SFO2 500.0920004 MHz  
 NUC2 1H  
 CPDPRG[2] waltz16  
 PCPD2 80.00 usec  
 PLW2 17.00000000 W  
 PLW12 0.52061999 W  
 PLW13 0.33320001 W

F2 - Processing parameters  
 SI 32768  
 SF 125.7477310 MHz  
 WDW EM  
 SSB 0  
 LB 1.00 Hz  
 GB 0  
 PC 1.40

# <sup>1</sup>H NMR Spectrum of 4-(diphenylamino)benzaldehyde(10)

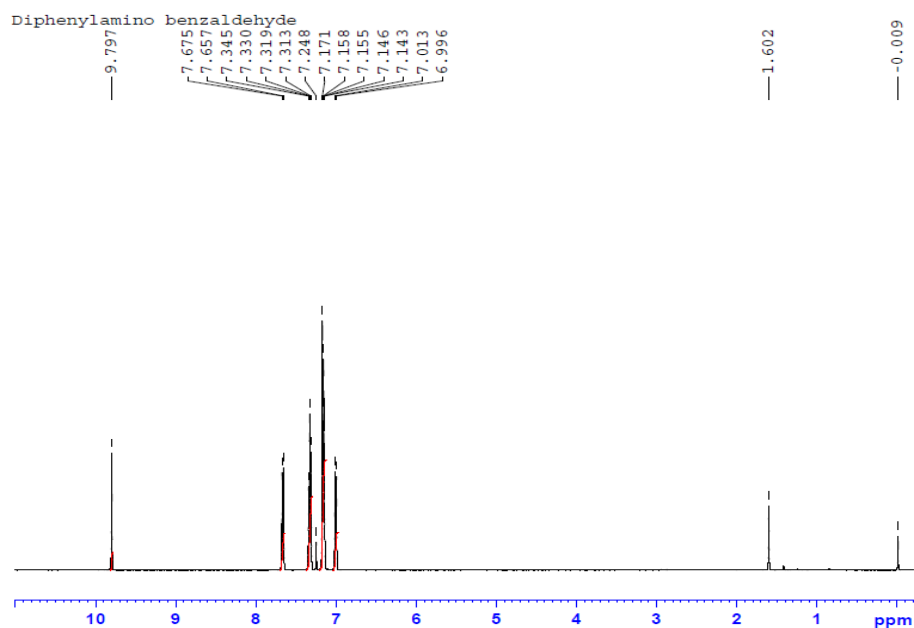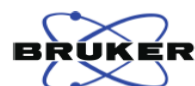

Current Data Parameters  
 NAME Bhadra  
 EXPNO 726  
 PROCNO 1

F2 - Acquisition Parameters  
 Date\_ 20140723  
 Time 19.27  
 INSTRUM spect  
 PROBHD 5 mm PABBO BB/  
 PULPROG zg30  
 TD 65536  
 SOLVENT CDCl3  
 NS 32  
 DS 2  
 SWH 10000.000 Hz  
 FIDRES 0.152588 Hz  
 AQ 3.2767999 sec  
 RG 179.35  
 DW 50.000 usec  
 DE 6.50 usec  
 TE 298.8 K  
 D1 1.00000000 sec  
 TDO 1

===== CHANNEL f1 =====  
 SF01 500.0930883 MHz  
 NUC1 1H  
 P1 12.15 usec  
 PLW1 17.00000000 W

F2 - Processing parameters  
 SI 65536  
 SF 500.0900215 MHz  
 WDW EM  
 SSB 0  
 LB 0.30 Hz  
 GB 0  
 PC 1.00

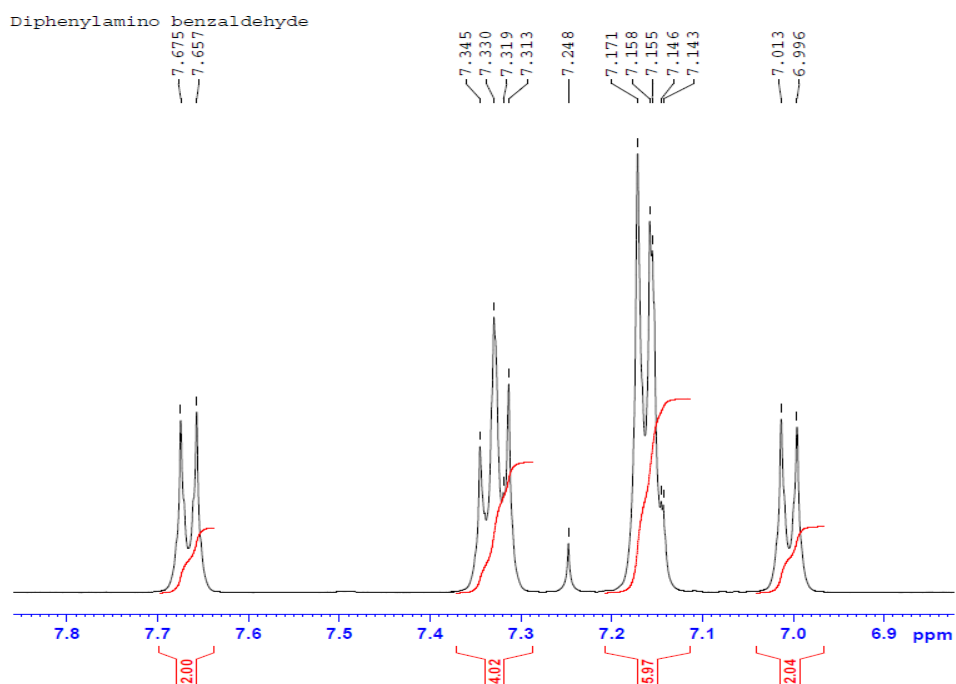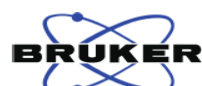

Current Data Parameters  
 NAME Bhadra  
 EXPNO 726  
 PROCNO 1

F2 - Acquisition Parameters  
 Date\_ 20140723  
 Time 19.27  
 INSTRUM spect  
 PROBHD 5 mm PABBO BB/  
 PULPROG zg30  
 TD 65536  
 SOLVENT CDCl3  
 NS 32  
 DS 2  
 SWH 10000.000 Hz  
 FIDRES 0.152588 Hz  
 AQ 3.2767999 sec  
 RG 179.35  
 DW 50.000 usec  
 DE 6.50 usec  
 TE 298.8 K  
 D1 1.00000000 sec  
 TDO 1

===== CHANNEL f1 =====  
 SF01 500.0930883 MHz  
 NUC1 1H  
 P1 12.15 usec  
 PLW1 17.00000000 W

F2 - Processing parameters  
 SI 65536  
 SF 500.0900215 MHz  
 WDW EM  
 SSB 0  
 LB 0.30 Hz  
 GB 0  
 PC 1.00

### <sup>13</sup>C NMR Spectrum of 4-(diphenylamino)benzaldehyde(10)

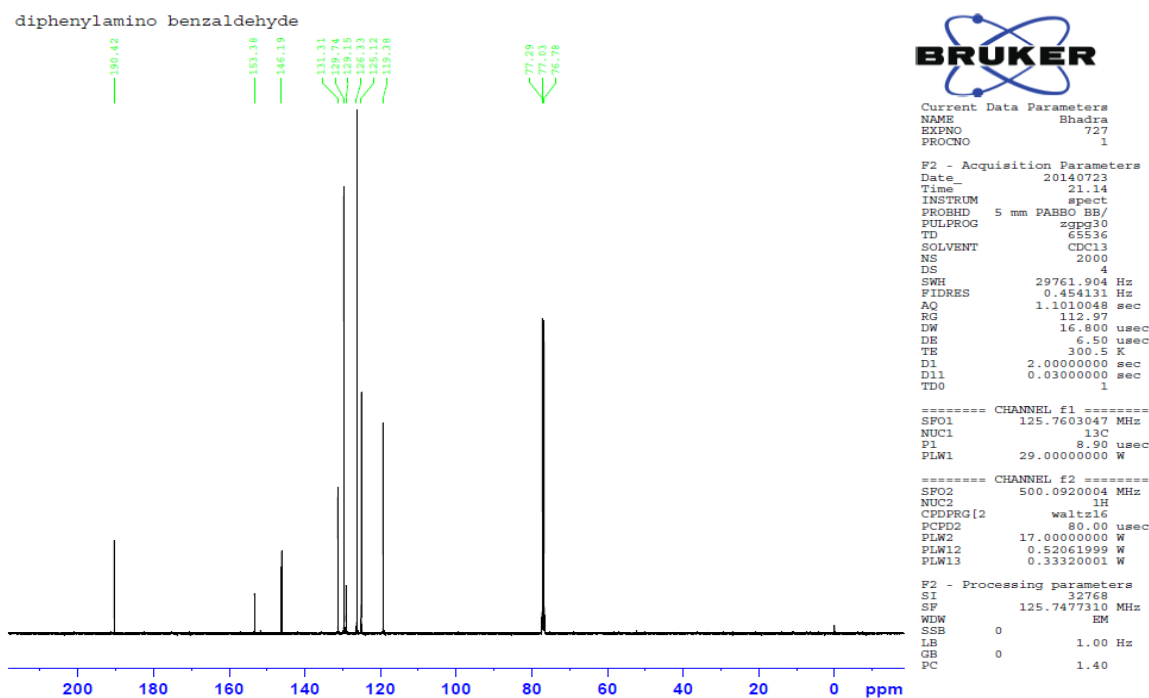

### <sup>1</sup>H NMR Spectrum of 4-(9H-carbazol-9-yl)benzaldehyde (11)

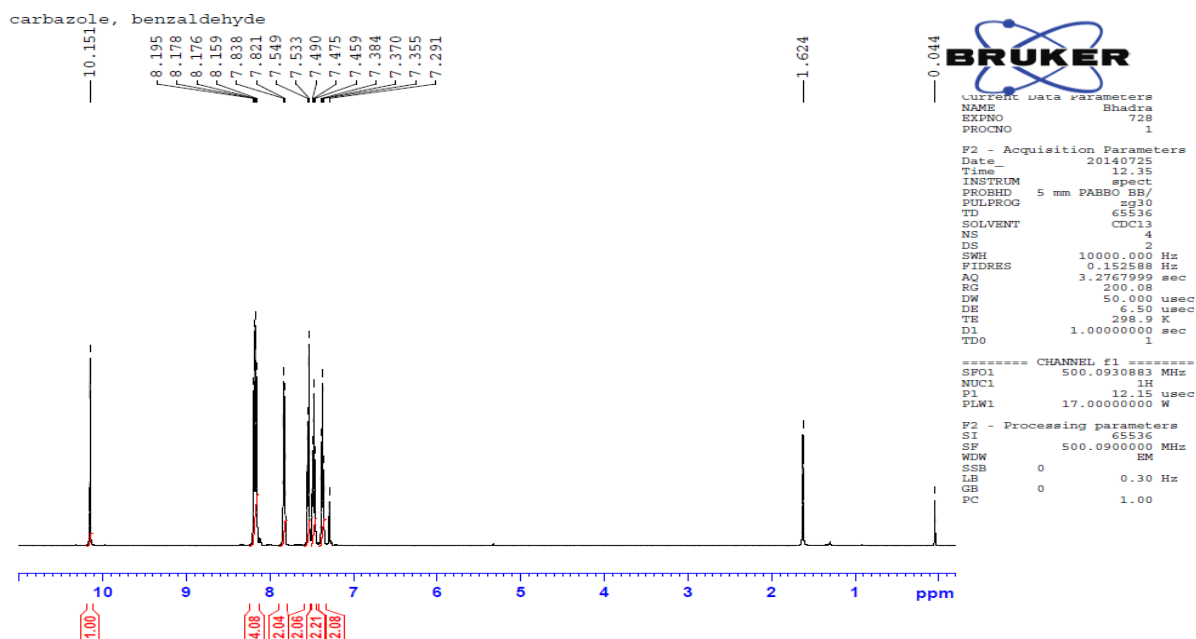

carbazole, benzaldehyde

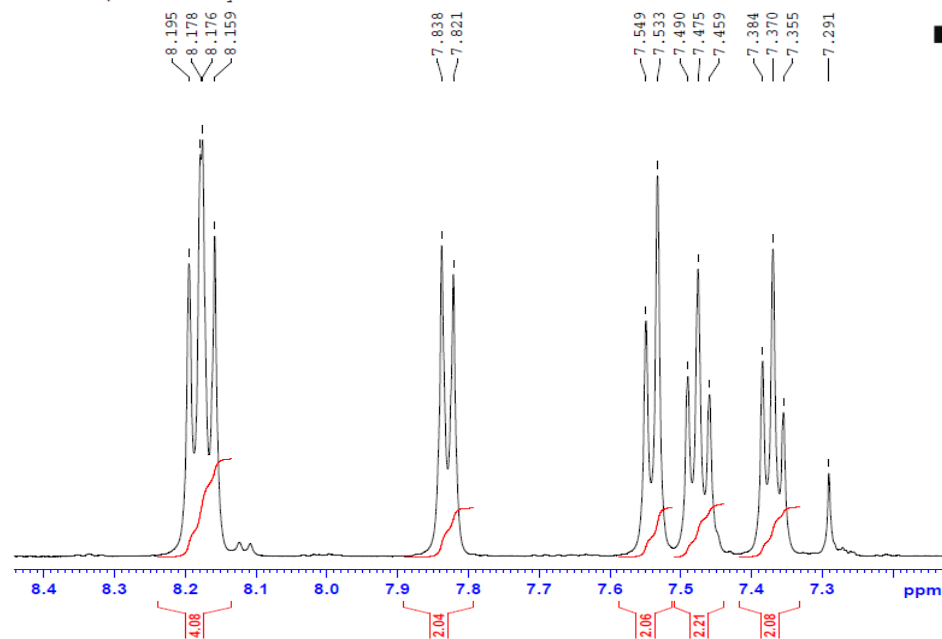

**BRUKER**

Current Data Parameters  
NAME Bhadra  
EXPNO 728  
PROCNO 1

F2 - Acquisition Parameters  
Date\_ 20140725  
Time 12.35  
INSTRUM spect  
PROBHD 5 mm PABBO BB/  
PULPROG zg30  
TD 65536  
SOLVENT CDCl3  
NS 4  
DS 2  
SWH 10000.000 Hz  
FIDRES 0.152588 Hz  
AQ 3.2767999 sec  
RG 200.08  
DW 50.000 use  
DE 6.50 use  
TE 298.9 K  
D1 1.0000000 sec  
TD0 1

===== CHANNEL f1 =====  
SFO1 500.0930883 MHz  
NUC1 1H  
P1 12.15 use  
PLW1 17.0000000 W

F2 - Processing parameters  
SI 65536  
SF 500.0900000 MHz  
WDW EM  
SSB 0  
LB 0.30 Hz  
GB 0  
PC 1.00

### <sup>13</sup>C NMR Spectrum of 4-(9H-carbazol-9-yl)benzaldehyde (11)

carbazole, benzaldehyde

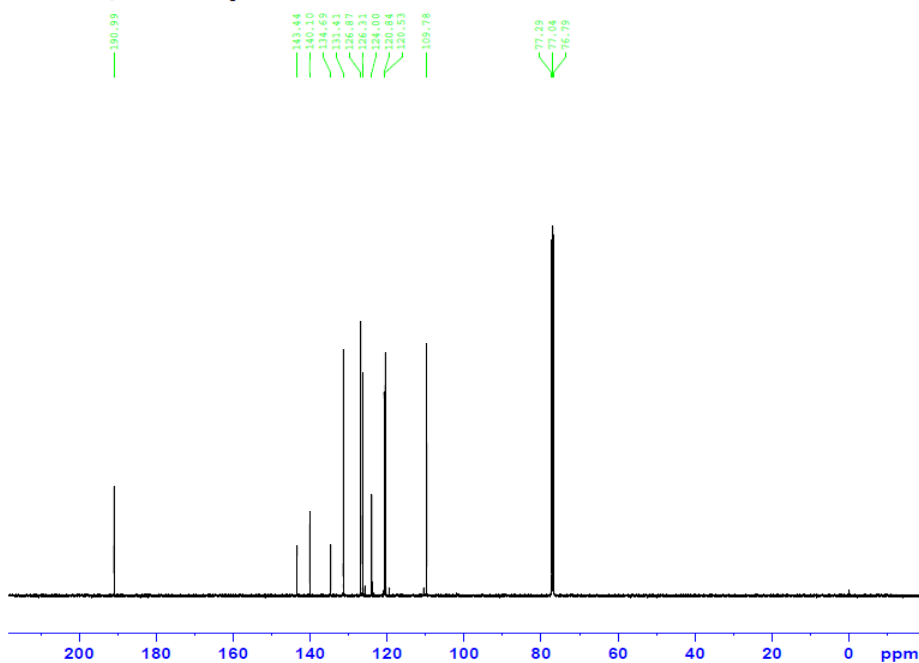

**BRUKER**

Current Data Parameters  
NAME Bhadra  
EXPNO 729  
PROCNO 1

F2 - Acquisition Parameters  
Date\_ 20140725  
Time 12.40  
INSTRUM spect  
PROBHD 5 mm PABBO BB/  
PULPROG zgpg30  
TD 65536  
SOLVENT CDCl3  
NS 2000  
DS 4  
SWH 29761.904 Hz  
FIDRES 0.454131 Hz  
AQ 1.1010048 sec  
RG 112.97  
DW 16.800 usec  
DE 6.50 usec  
TE 299.7 K  
D1 2.0000000 sec  
D11 0.03000000 sec  
TD0 1

===== CHANNEL f1 =====  
SFO1 125.7603047 MHz  
NUC1 13C  
P1 8.90 usec  
PLW1 29.0000000 W

===== CHANNEL f2 =====  
SFO2 500.0920004 MHz  
NUC2 1H  
CDPRG[2] waltz16  
PCD2 80.00 usec  
PLW2 17.0000000 W  
PLW12 0.52061999 W  
PLW13 0.33320001 W

F2 - Processing parameters  
SI 32768  
SF 125.7477310 MHz  
WDW EM  
SSB 0  
LB 1.00 Hz  
GB 0  
PC 1.40



## Mass spectrum of 4-(9H-carbazol-9-yl)benzaldehyde (11)

Exact mass: 271.099

Mass obtained in the positive mode: 272.0758

Elemental composition: C<sub>19</sub>H<sub>14</sub>NO

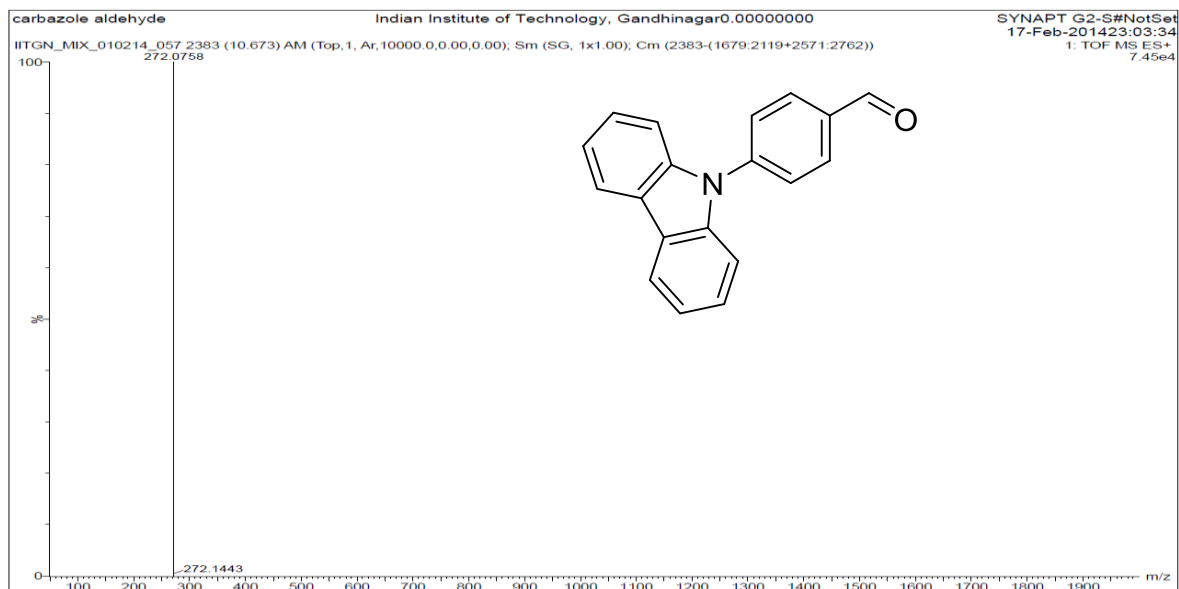

## <sup>1</sup>H NMR Spectrum of (Z)-3-(4-(dimethylamino)phenyl)-2-(4-hydroxyphenyl)acrylonitrile (1)

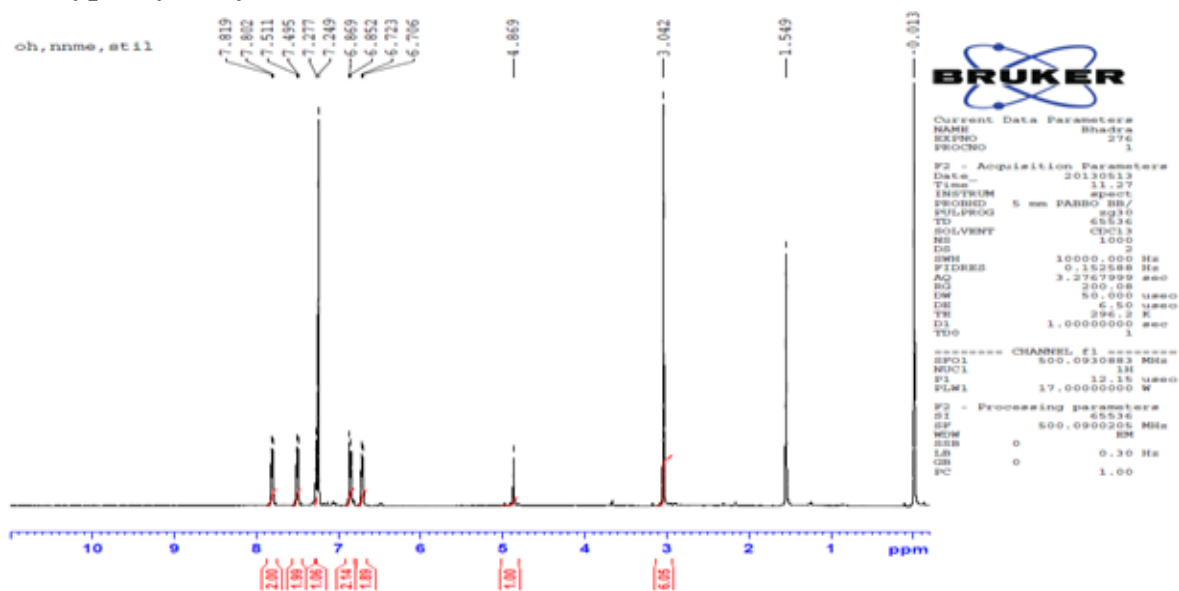

# <sup>13</sup>C NMR Spectrum of (Z)-3-(4-(dimethylamino)phenyl)-2-(4-hydroxyphenyl)acrylonitrile (1)

oh, nmme, stil

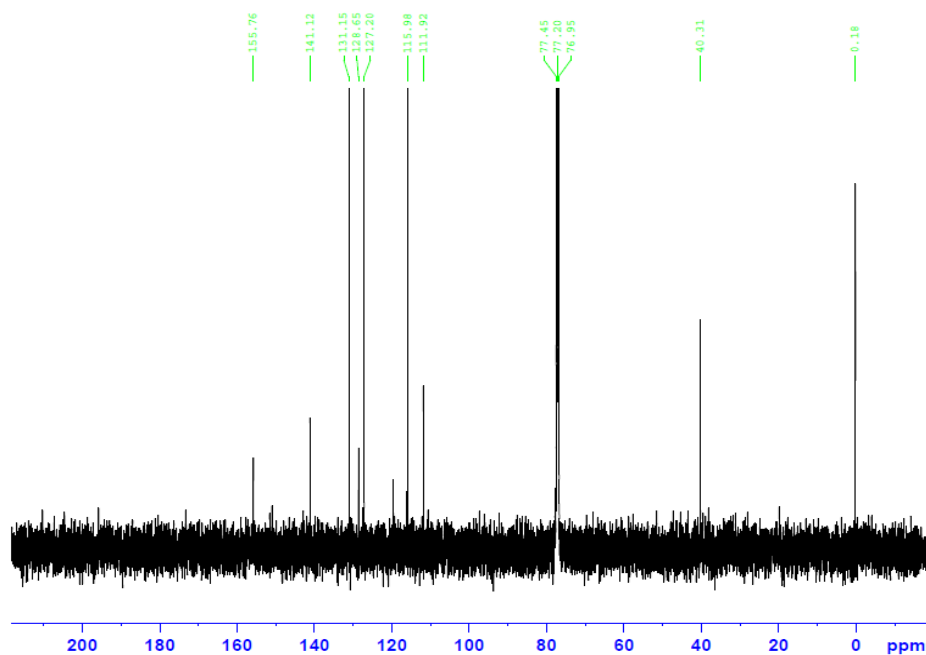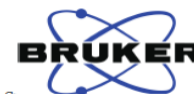

```

===== CHANNEL f1 =====
SFO1 125.7603047 MHz
NUC1 13C
P1 8.90 usec
PLW1 29.00000000 W

===== CHANNEL f2 =====
SFO2 500.0920004 MHz
NUC2 1H
CPDPRG2 waltz16
PCPD2 80.00 usec
PLW2 17.00000000 W
PLW12 0.52061999 W
PLW13 0.33320001 W

F2 - Processing parameters
SI 32768
SF 125.7477077 MHz
WDW EM
SSB 0
LB 1.00 Hz
GB 0
PC 1.40
    
```

## Mass spectrum of (Z)-3-(4-(dimethylamino)phenyl)-2-(4-hydroxyphenyl)acrylonitrile (1)

Exact mass 264.13

Mass obtained in positive mode 265.1266 (M+1)

Elemental Composition C<sub>17</sub>H<sub>16</sub>N<sub>2</sub>O (Obtained in the positive mode)

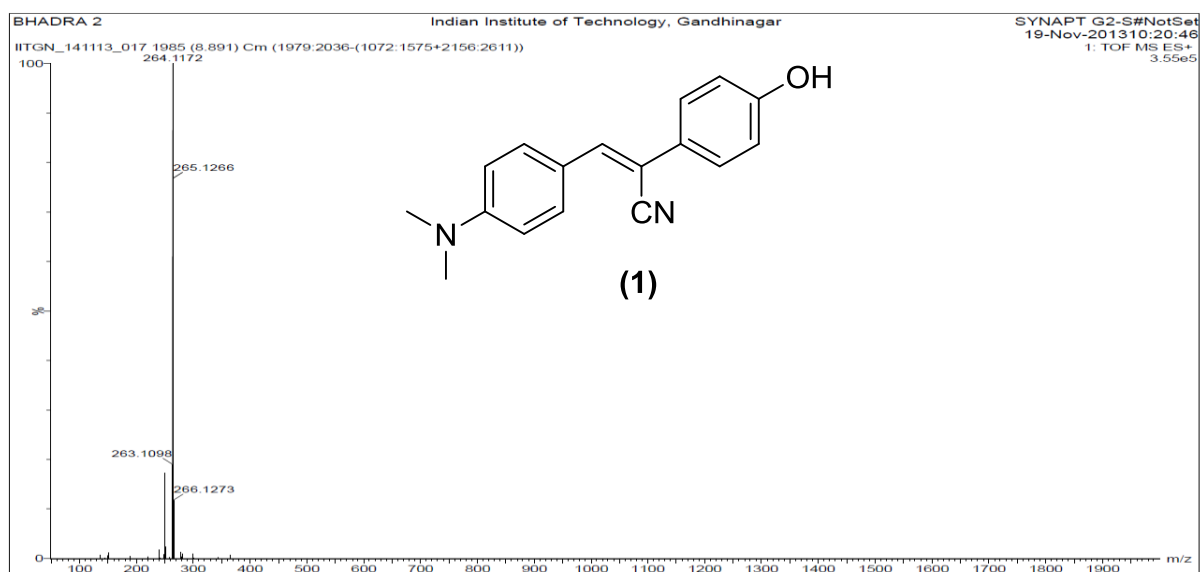

# <sup>1</sup>H NMR Spectrum of (Z)-3-(4-(dimethylamino)phenyl)-2-(4-hydroxyphenyl)acrylonitrile (1) in neutral medium

CN, NNMe, Stil, OHneutral

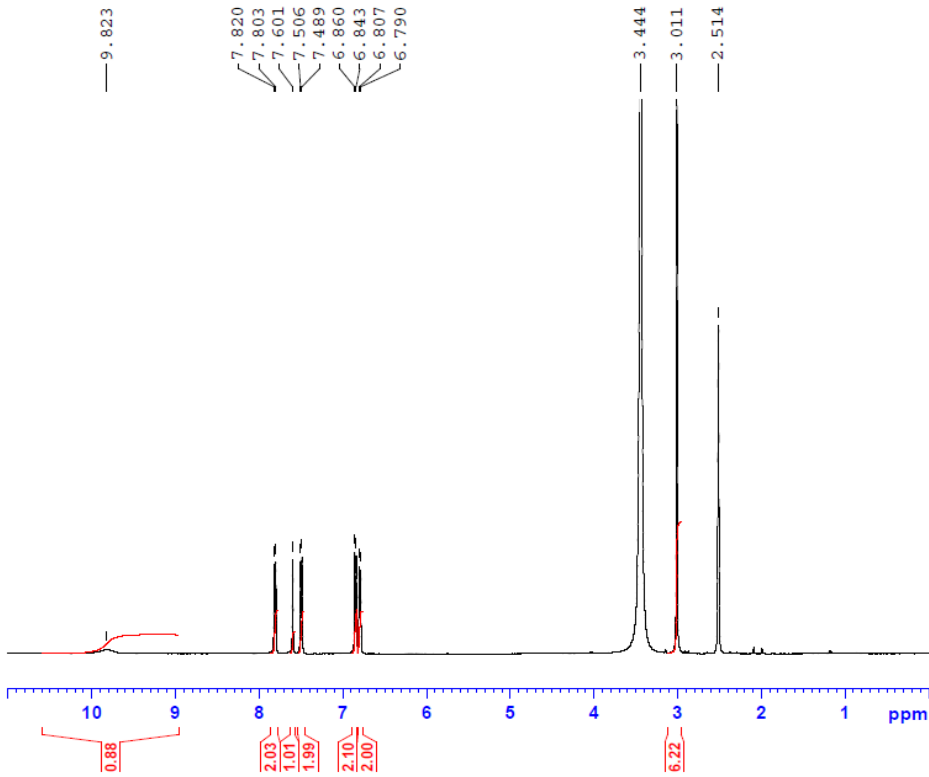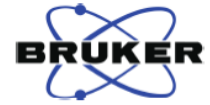

```

Current Data Parameters
NAME          Bhadra
EXPNO        431
PROCNO       1

F2 - Acquisition Parameters
Date_        20131120
Time_        10.48
INSTRUM      spect
PROBHD       5 mm PABBO BB/
PULPROG      zg30
TD           65536
SOLVENT      DMSO
NS           400
DS           2
SWH          10000.000 Hz
FIDRES       0.152588 Hz
AQ           3.2767999 sec
RG           87.12
DW           50.000 usec
DE           6.50 usec
TE           297.0 K
D1           1.00000000 sec
TD0          1

===== CHANNEL f1 =====
SFO1         500.0930883 MHz
NUC1         1H
P1           12.15 usec
PLW1         17.00000000 W

F2 - Processing parameters
SI           65536
SF           500.0900000 MHz
WDW          EM
SSB          0
LB           0.30 Hz
GB           0
PC           1.00
    
```

CN, NNMe, Stil, OHneutral

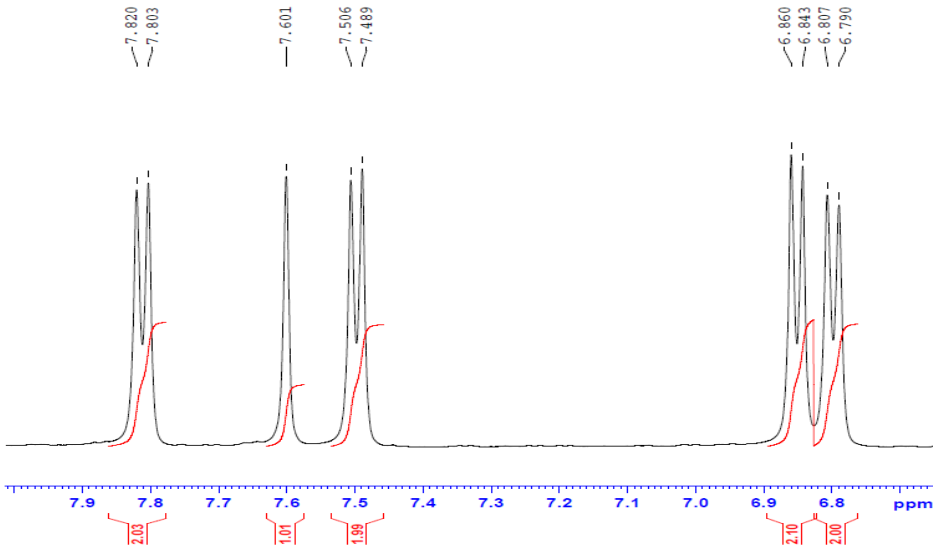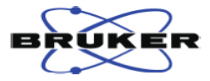

```

Current Data Parameters
NAME          Bhadra
EXPNO        431
PROCNO       1

F2 - Acquisition Parameters
Date_        20131120
Time_        10.48
INSTRUM      spect
PROBHD       5 mm PABBO BB/
PULPROG      zg30
TD           65536
SOLVENT      DMSO
NS           400
DS           2
SWH          10000.000 Hz
FIDRES       0.152588 Hz
AQ           3.2767999 sec
RG           87.12
DW           50.000 usec
DE           6.50 usec
TE           297.0 K
D1           1.00000000 sec
TD0          1

===== CHANNEL f1 =====
SFO1         500.0930883 MHz
NUC1         1H
P1           12.15 usec
PLW1         17.00000000 W

F2 - Processing parameters
SI           65536
SF           500.0900000 MHz
WDW          EM
SSB          0
LB           0.30 Hz
GB           0
PC           1.00
    
```

# <sup>1</sup>H NMR Spectrum of (Z)-3-(4-(dimethylamino)phenyl)-2-(4-hydroxyphenyl)acrylonitrile (1) in acidic medium

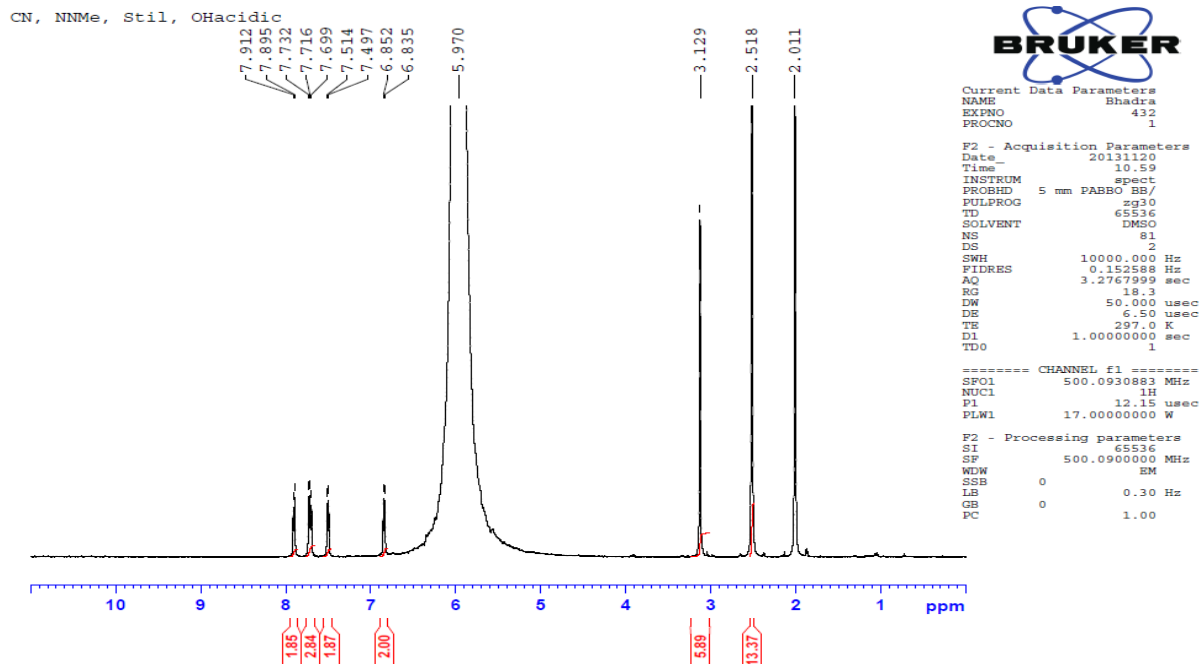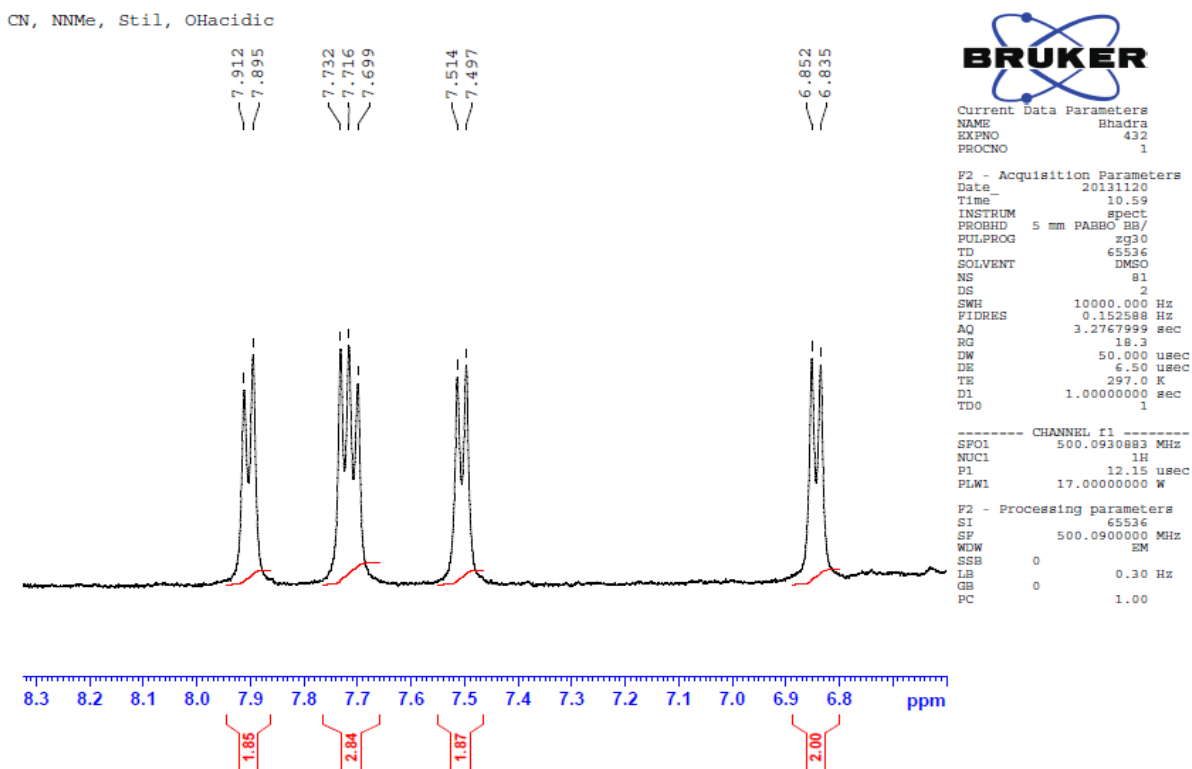

**<sup>1</sup>H NMR Spectrum of (Z)-3-(4-(dimethylamino)phenyl)-2-(4-hydroxyphenyl)acrylonitrile (1) in basic medium**

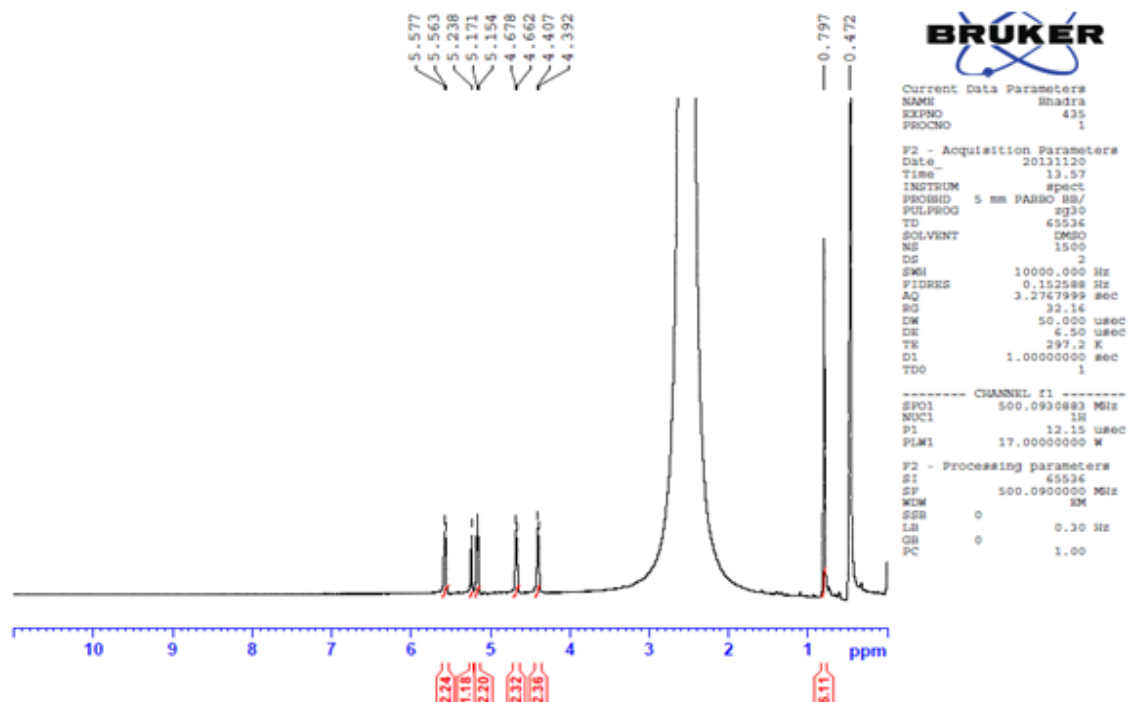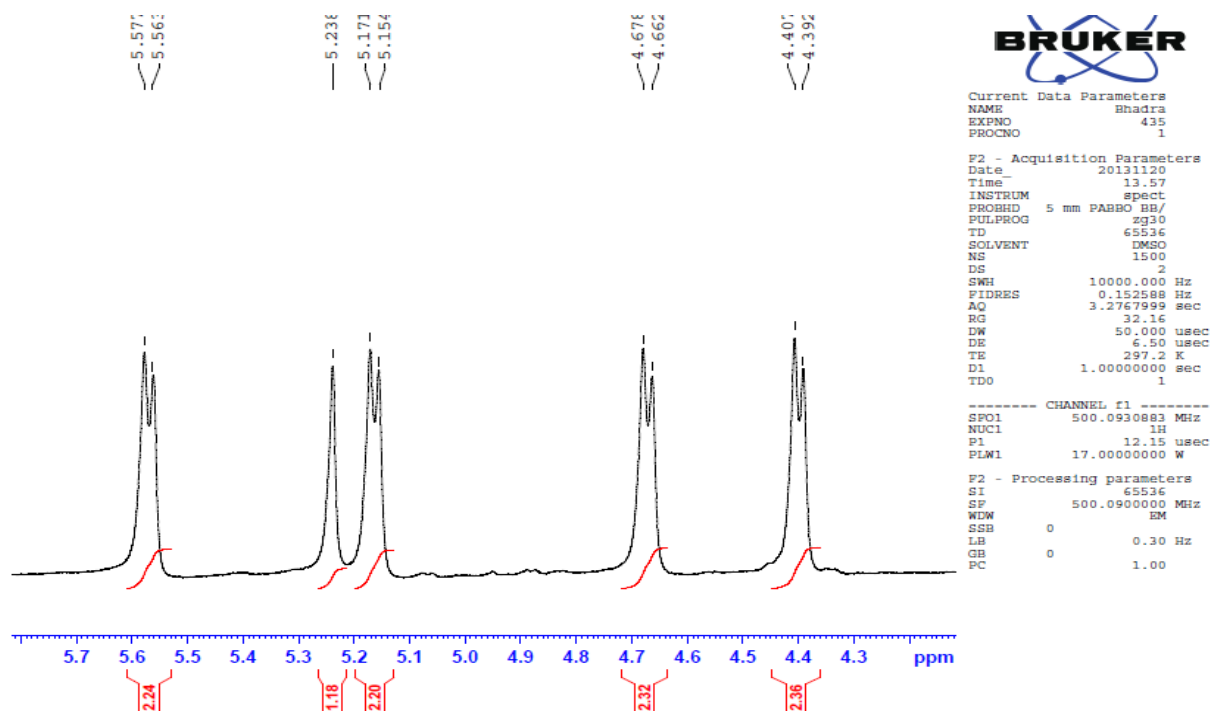

# <sup>1</sup>H NMR Spectrum of stilbene (Z)-3-(4-(diphenylamino)phenyl)-2-(4-hydroxyphenyl)acrylonitrile (2)

nmmeqh, cn, stil, oh

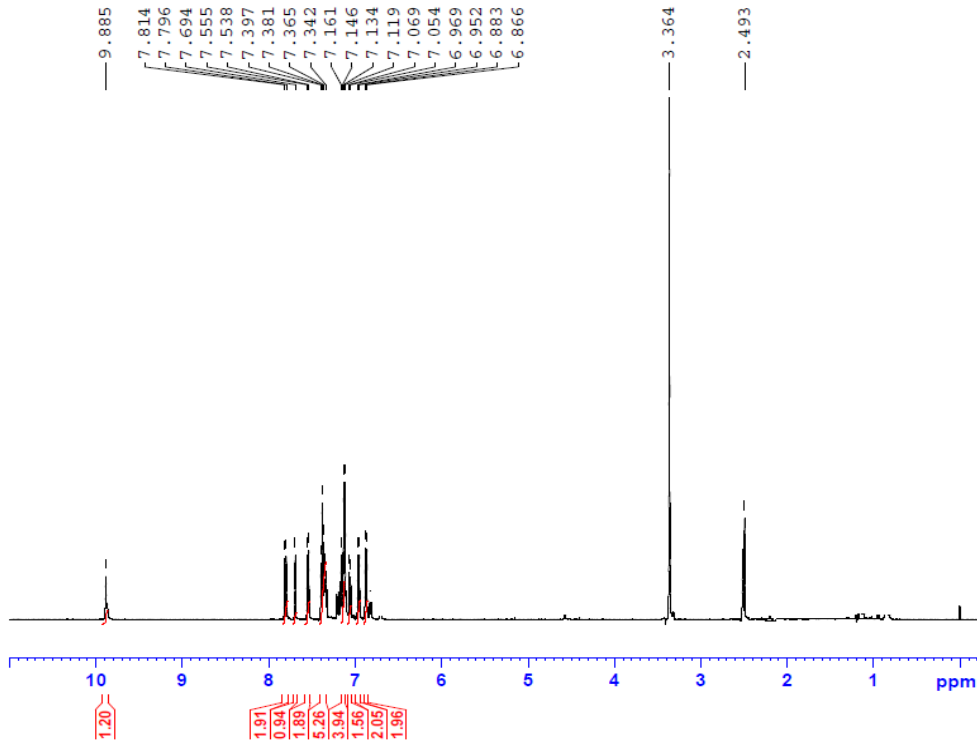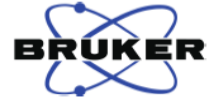

```

Current Data Parameters
NAME          Bhadra
EXPNO         461
PROCNO        1

F2 - Acquisition Parameters
Date_         20140109
Time          18.52
INSTRUM       spect
PROBHD        5 mm PABBO BB/
PULPROG       zg30
TD            65536
SOLVENT       DMSO
NS            32
DS            2
SWH           10000.000 Hz
FIDRES        0.152588 Hz
AQ            3.2767999 sec
RG            137.26
DW            50.000 usec
DE            6.50 usec
TE            297.5 K
D1            1.00000000 sec
TDO           1

===== CHANNEL f1 =====
SPOL          500.0930883 MHz
NUC1          1H
P1            12.15 usec
PLW1          17.00000000 W

F2 - Processing parameters
SI            65536
SF            500.0900000 MHz
WDW           EM
SSB           0
LB            0.30 Hz
GB            0
PC            1.00
    
```

nmmeqh, cn, stil, oh

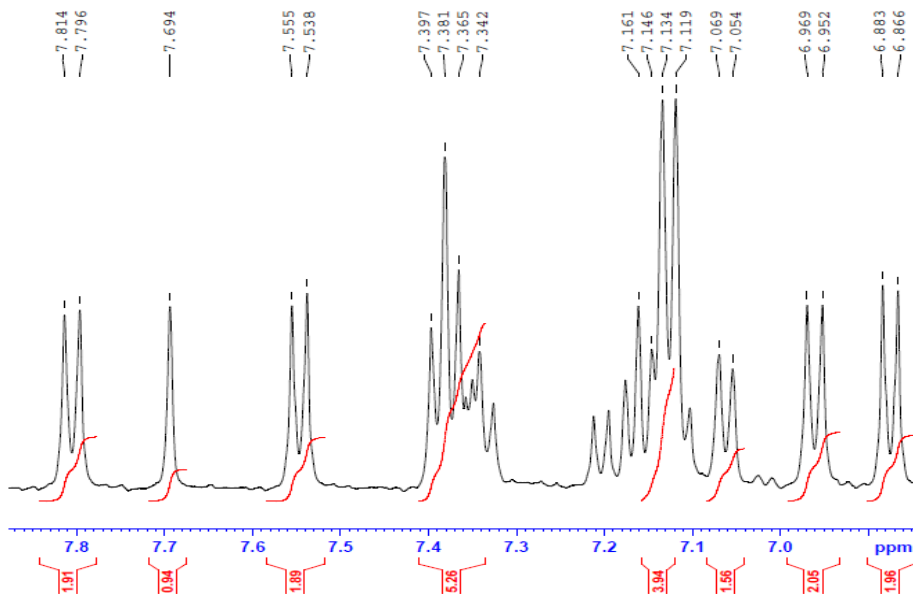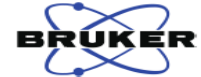

```

Current Data Parameters
NAME          Bhadra
EXPNO         461
PROCNO        1

F2 - Acquisition Parameters
Date_         20140109
Time          18.52
INSTRUM       spect
PROBHD        5 mm PABBO BB/
PULPROG       zg30
TD            65536
SOLVENT       DMSO
NS            32
DS            2
SWH           10000.000 Hz
FIDRES        0.152588 Hz
AQ            3.2767999 sec
RG            137.26
DW            50.000 usec
DE            6.50 usec
TE            297.5 K
D1            1.00000000 sec
TDO           1

----- CHANNEL f1 -----
SPOL          500.0930883 MHz
NUC1          1H
P1            12.15 usec
PLW1          17.00000000 W

F2 - Processing parameters
SI            65536
SF            500.0900000 MHz
WDW           EM
SSB           0
LB            0.30 Hz
GB            0
PC            1.00
    
```

**<sup>13</sup>C NMR Spectrum of stilbene (Z)-3-(4-(diphenylamino)phenyl)-2-(4-hydroxyphenyl)acrylonitrile (2)**

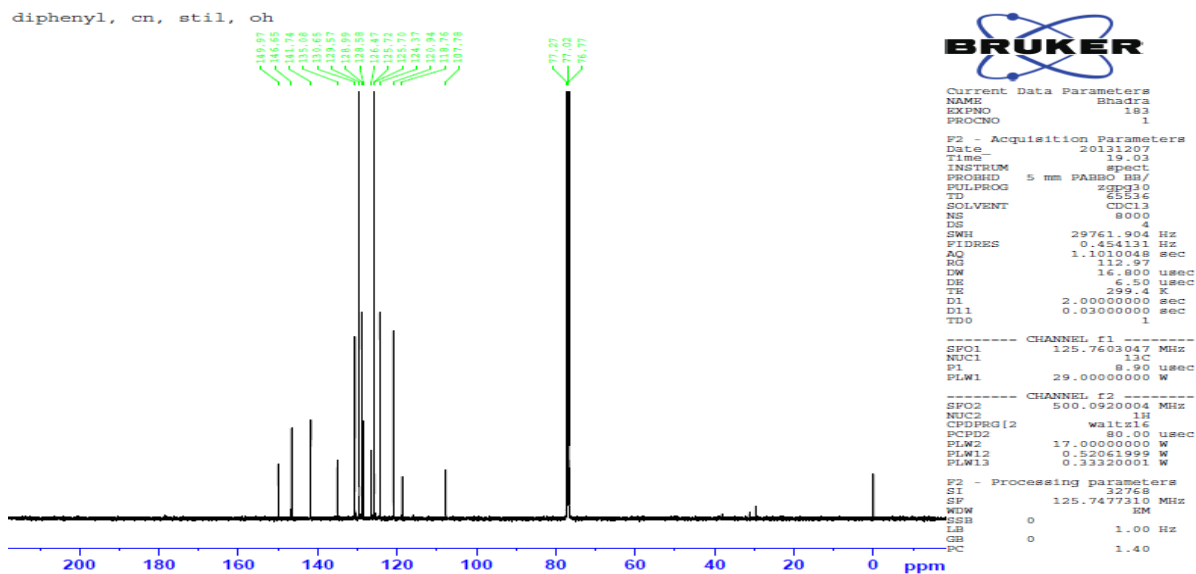

**Mass spectrum of stilbene (Z)-3-(4-(diphenylamino)phenyl)-2-(4-hydroxyphenyl)acrylonitrile (2)**

Exact mass 388.16

Mass obtained in positive mode 389.1853 (M+1)

Elemental Composition C<sub>27</sub>H<sub>21</sub>N<sub>2</sub>O (Obtained in the positive mode)

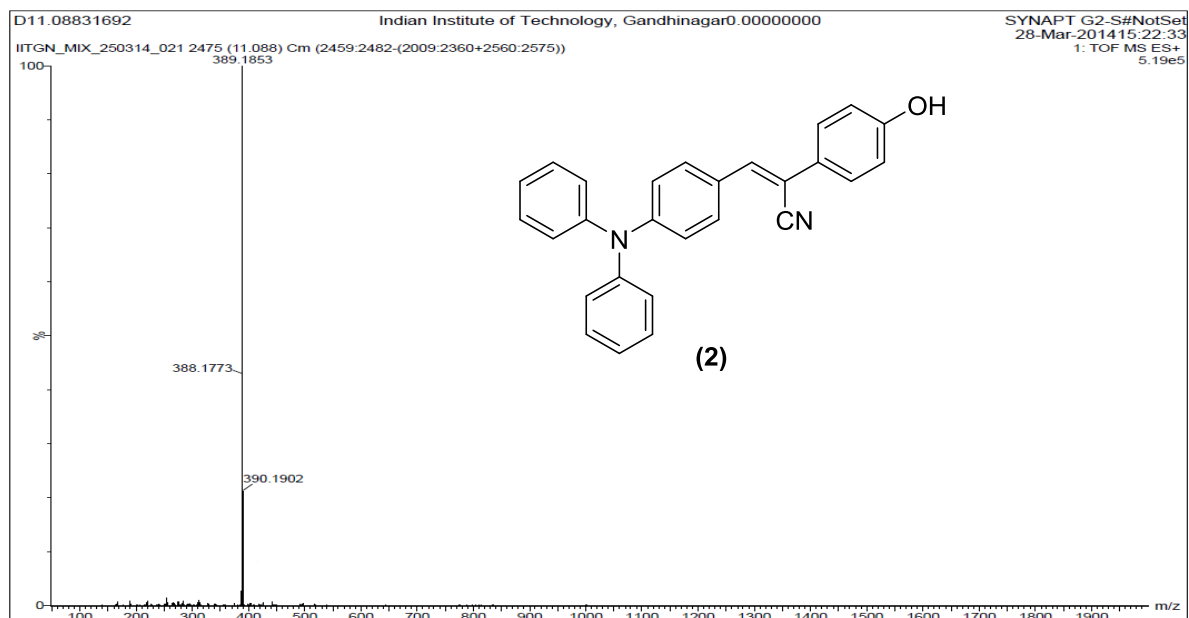

# <sup>1</sup>H NMR Spectrum of stilbene (Z)-3-(4-(9H-carbazol-9-yl)phenyl)-2-(4-hydroxyphenyl)acrylonitrile (3)

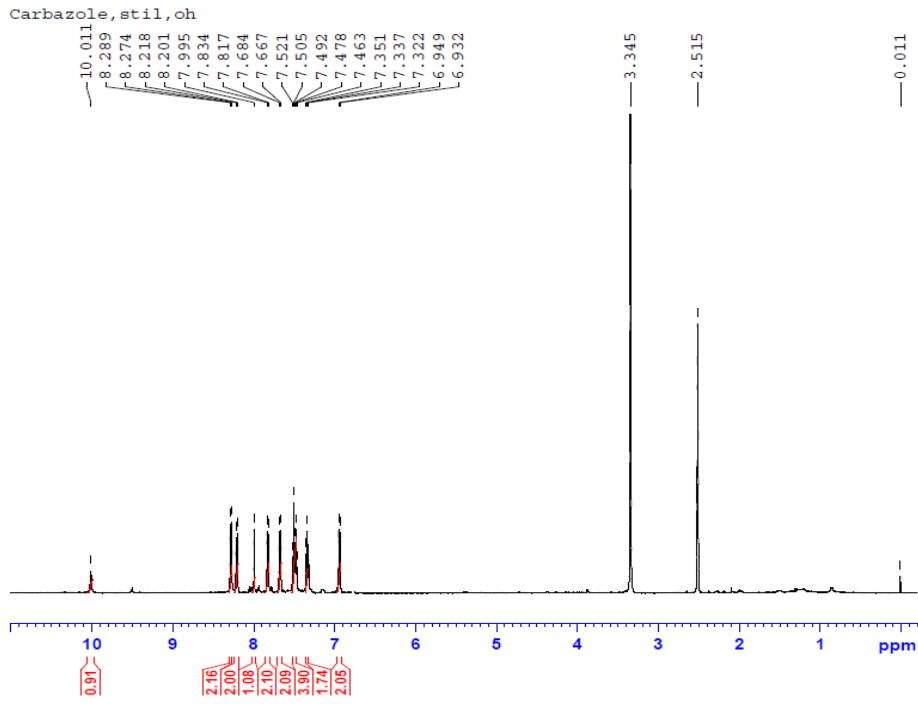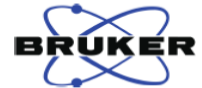

Current Data Parameters  
 NAME Bhadra  
 EXPNO 494  
 PROCNO 1

F2 - Acquisition Parameters  
 Date\_ 20140304  
 Time\_ 11.45  
 INSTRUM spect  
 PROBHD 5 mm PABBO BB/  
 PULPROG zg30  
 TD 65536  
 SOLVENT DMSO  
 NS 32  
 DS 2  
 SWH 10000.000 Hz  
 FIDRES 0.152588 Hz  
 AQ 3.2767999 sec  
 RG 200.08  
 DW 50.000 usec  
 DE 6.50 usec  
 TE 299.6 K  
 D1 1.00000000 sec  
 TDO 1

==== CHANNEL f1 =====  
 SFO1 500.0930883 MHz  
 NUC1 1H  
 P1 12.15 usec  
 PLW1 17.00000000 W

F2 - Processing parameters  
 SI 65536  
 SF 500.0900000 MHz  
 WDW EM  
 SSB 0  
 LB 0.30 Hz  
 GB 0  
 PC 1.00

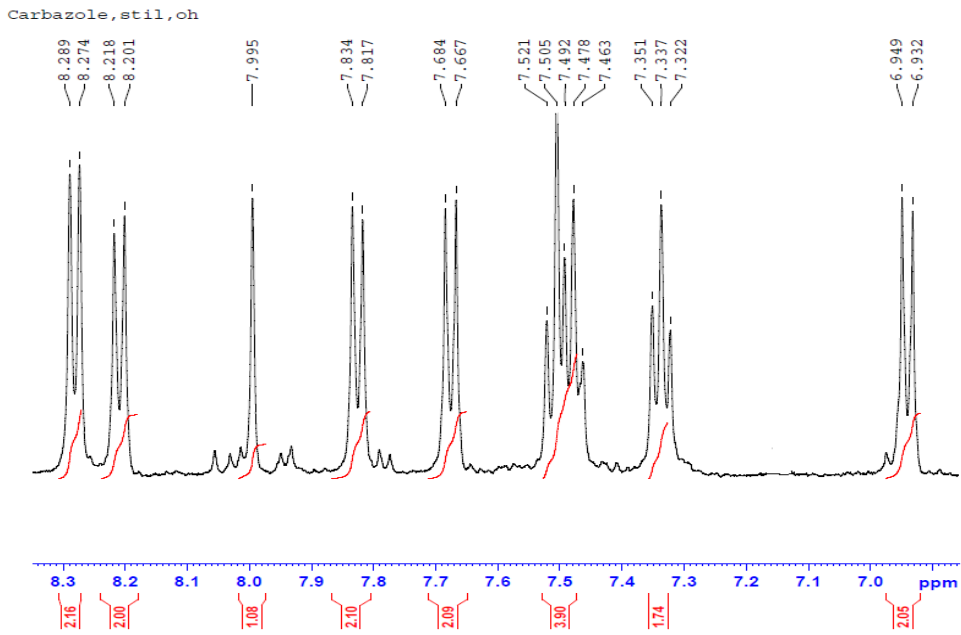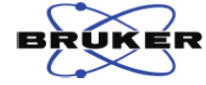

Current Data Parameters  
 NAME Bhadra  
 EXPNO 494  
 PROCNO 1

F2 - Acquisition Parameters  
 Date\_ 20140304  
 Time\_ 11.45  
 INSTRUM spect  
 PROBHD 5 mm PABBO BB/  
 PULPROG zg30  
 TD 65536  
 SOLVENT DMSO  
 NS 32  
 DS 2  
 SWH 10000.000 Hz  
 FIDRES 0.152588 Hz  
 AQ 3.2767999 sec  
 RG 200.08  
 DW 50.000 usec  
 DE 6.50 usec  
 TE 299.6 K  
 D1 1.00000000 sec  
 TDO 1

==== CHANNEL f1 =====  
 SFO1 500.0930883 MHz  
 NUC1 1H  
 P1 12.15 usec  
 PLW1 17.00000000 W

F2 - Processing parameters  
 SI 65536  
 SF 500.0900000 MHz  
 WDW EM  
 SSB 0  
 LB 0.30 Hz  
 GB 0  
 PC 1.00



### <sup>13</sup>C NMR Spectrum of stilbene (3)

Carbazole, stil, oh

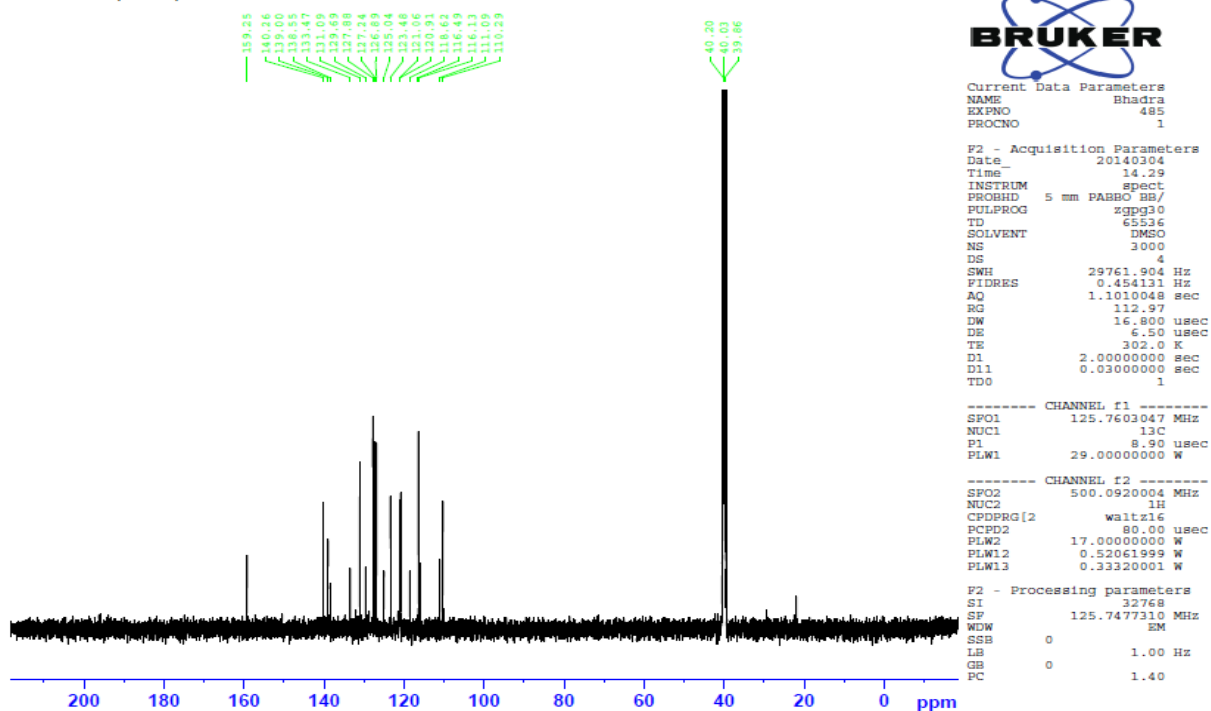

### Mass spectrum of stilbene (3)

Exact mass 386.14

Mass obtained in positive mode 387.1707 (M+1)

Elemental Composition C<sub>27</sub>H<sub>19</sub>N<sub>2</sub>O (Obtained in the positive mode)

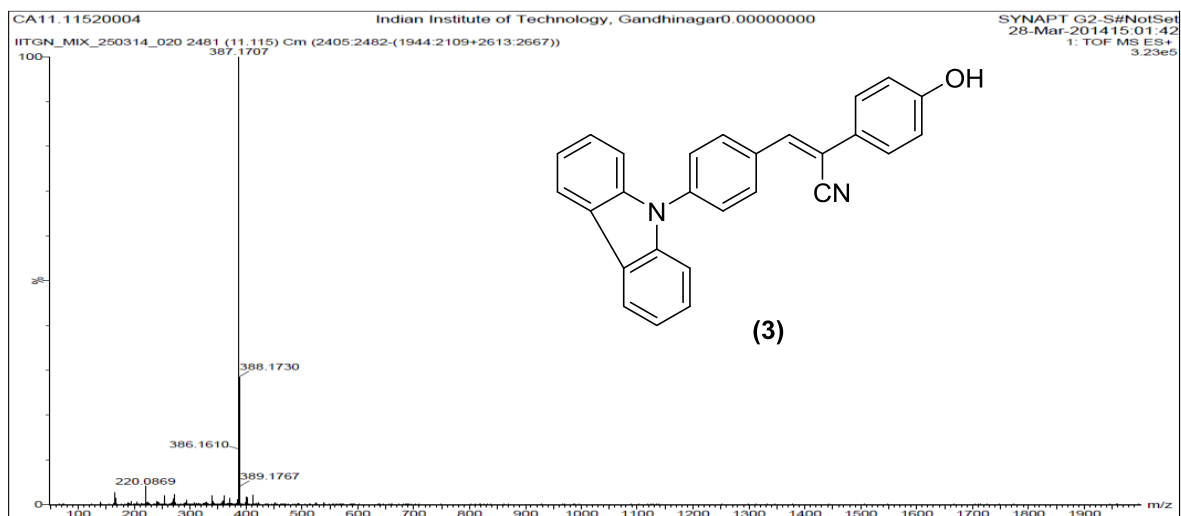

# <sup>1</sup>H NMR Spectrum of stilbene (4)

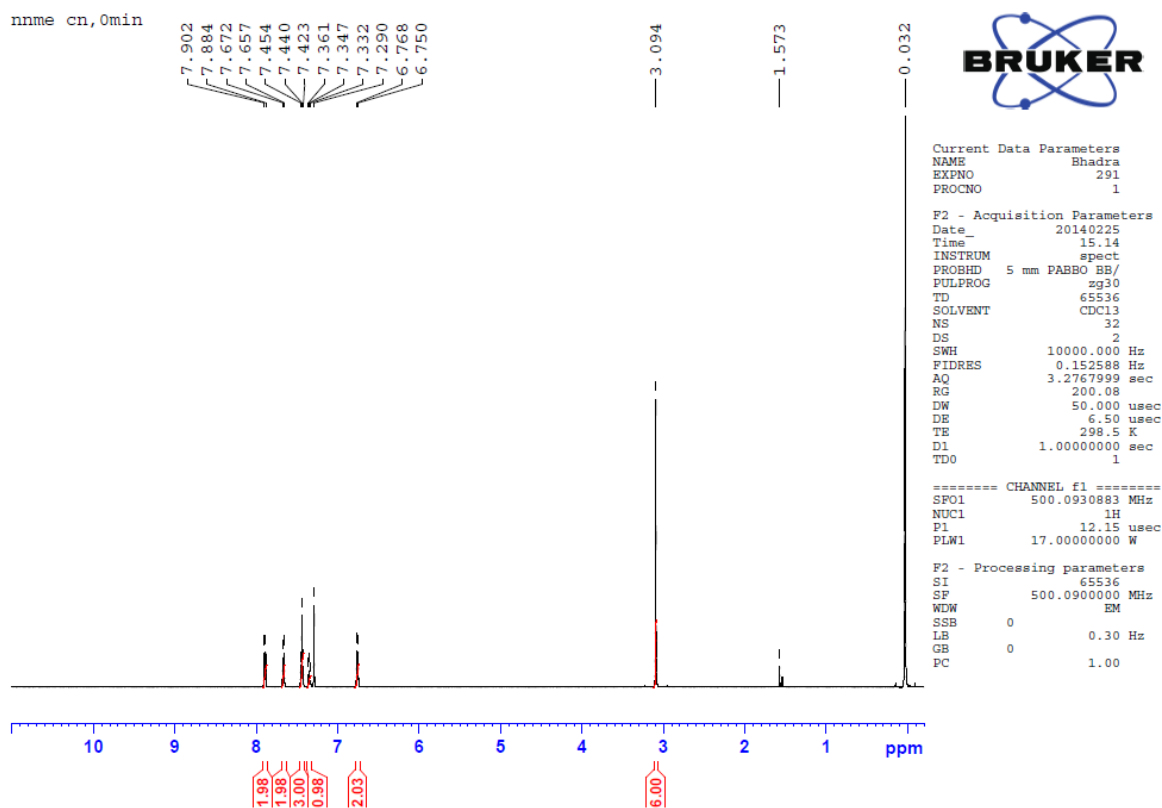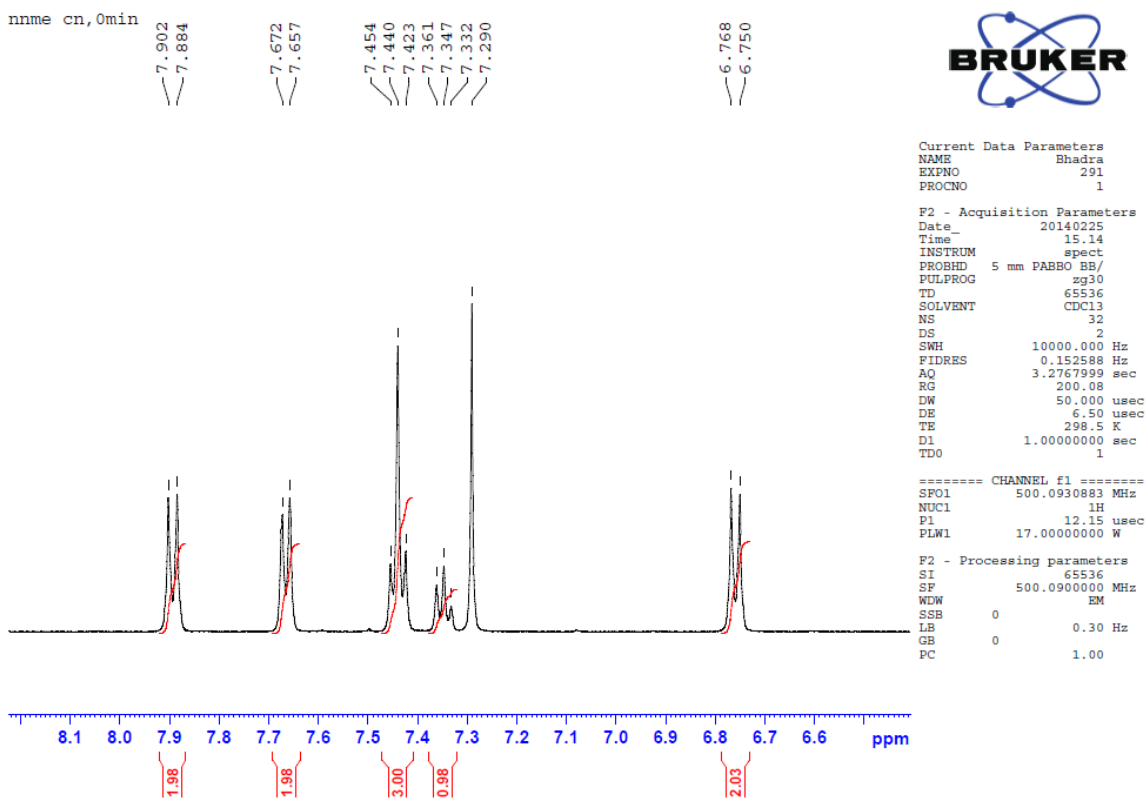

# <sup>13</sup>C NMR Spectrum of stilbene (4)

CN, NNMe, Stil (no OH) c13

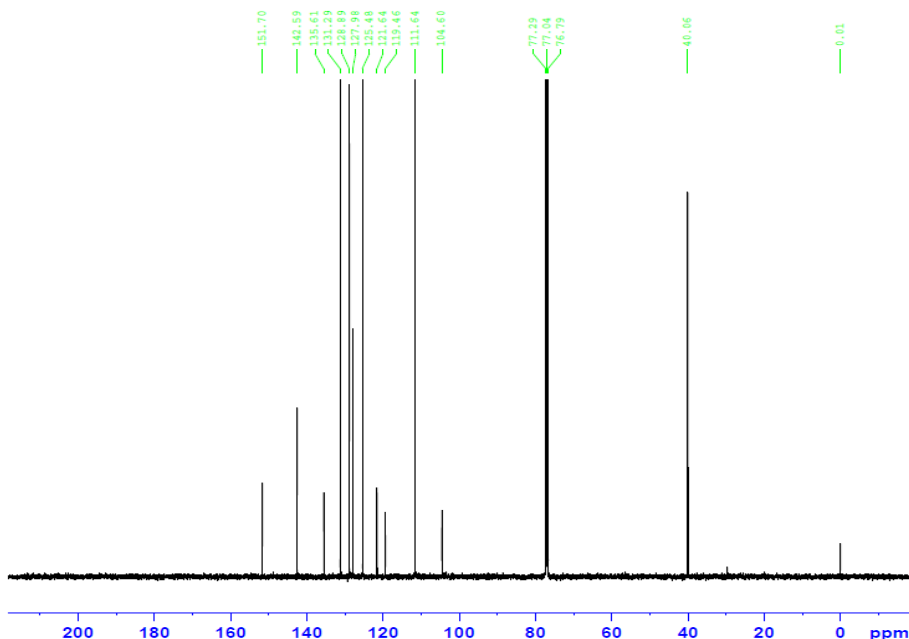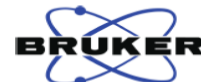

Current Data Parameters  
 NAME Bhadra  
 EXPNO 164  
 PROCNO 1

F2 - Acquisition Parameters  
 Date\_ 20131119  
 Time 12.00  
 INSTRUM spect  
 PROBHD 5 mm PABBO BB/  
 PULPROG zgpg30  
 TD 65536  
 SOLVENT CDCl3  
 NS 2000  
 DS 4  
 SWH 29761.904 Hz  
 FIDRES 0.454131 Hz  
 AQ 1.1010048 sec  
 RG 200.08  
 DW 16.800 usec  
 DE 6.50 usec  
 TE 299.3 K  
 D1 2.0000000 sec  
 D11 0.0300000 sec  
 TDO 1

===== CHANNEL f1 =====  
 SFO1 125.7603047 MHz  
 NUC1 13C  
 P1 8.90 usec  
 PLW1 29.0000000 W

===== CHANNEL F2 =====  
 SFO2 500.0920004 MHz  
 NUC2 1H  
 CPDPRG[2] waltz16  
 PCPD2 80.00 usec  
 PLW2 17.0000000 W  
 PLW12 0.52061999 W  
 PLW13 0.33320001 W

F2 - Processing parameters  
 SI 32768  
 SF 125.7477310 MHz  
 WDW EM  
 SSB 0  
 LB 1.00 Hz  
 GB 0  
 PC 1.40

# <sup>1</sup>H NMR Spectrum of stilbene (4) in neutral medium

nnme, cn, neutral, no oh

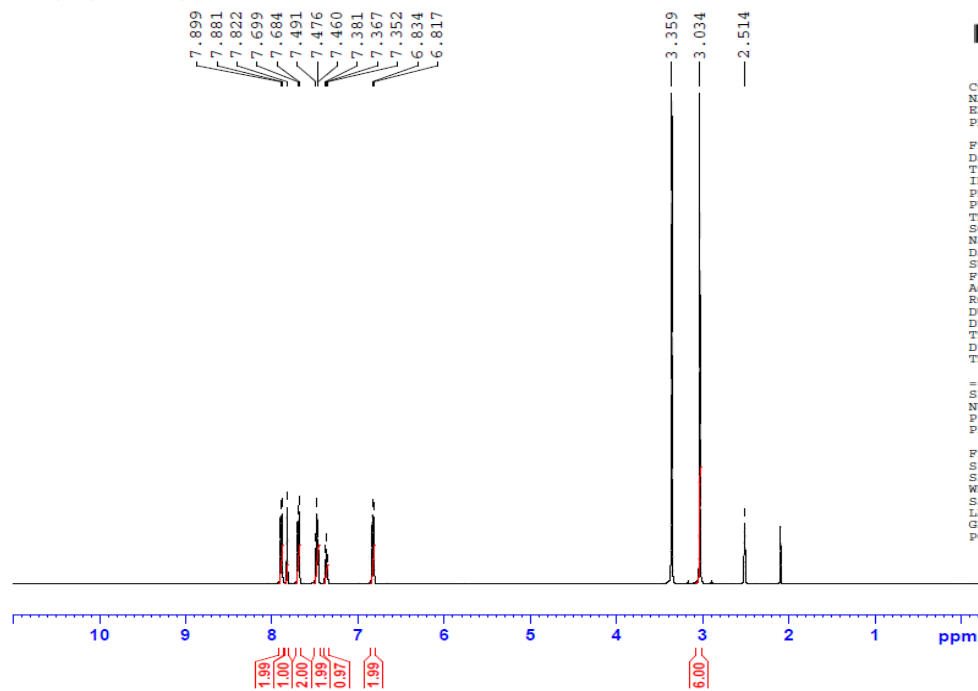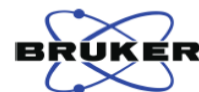

Current Data Parameters  
 NAME Bhadra  
 EXPNO 406  
 PROCNO 1

F2 - Acquisition Parameters  
 Date\_ 20140507  
 Time 10.51  
 INSTRUM spect  
 PROBHD 5 mm PABBO BB/  
 PULPROG zg30  
 TD 65536  
 SOLVENT DMSO  
 NS 32  
 DS 2  
 SWH 10000.000 Hz  
 FIDRES 0.152588 Hz  
 AQ 3.2767999 sec  
 RG 157.63  
 DW 50.000 usec  
 DE 6.50 usec  
 TE 296.6 K  
 D1 1.0000000 sec  
 TDO 1

===== CHANNEL f1 =====  
 SFO1 500.0930883 MHz  
 NUC1 1H  
 P1 12.15 usec  
 PLW1 17.0000000 W

F2 - Processing parameters  
 SI 65536  
 SF 500.0900000 MHz  
 WDW EM  
 SSB 0  
 LB 0.30 Hz  
 GB 0  
 PC 1.00

nmme, cn, neutral, no oh

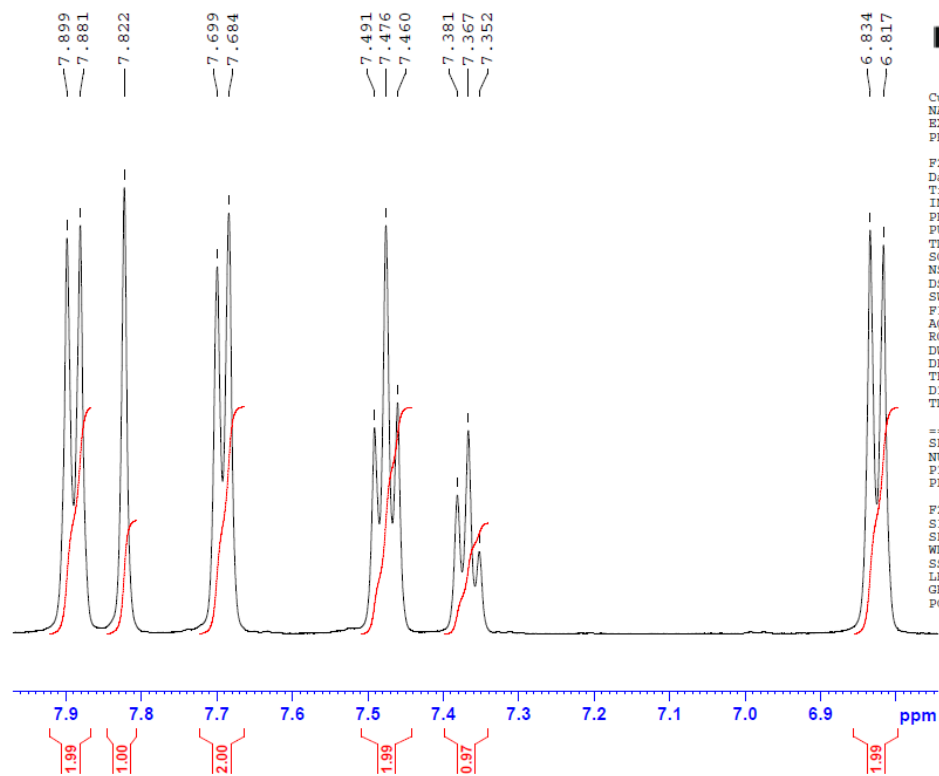

### <sup>1</sup>H NMR Spectrum of stilbene (4) in acidic medium

nmme, cn, acidic, no oh

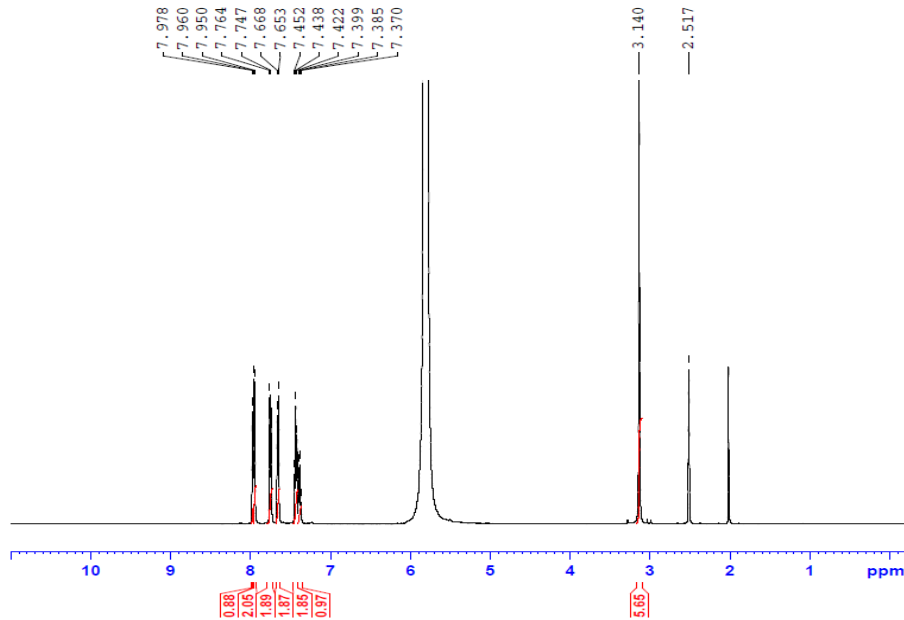

nmme, cn, acidic, no oh

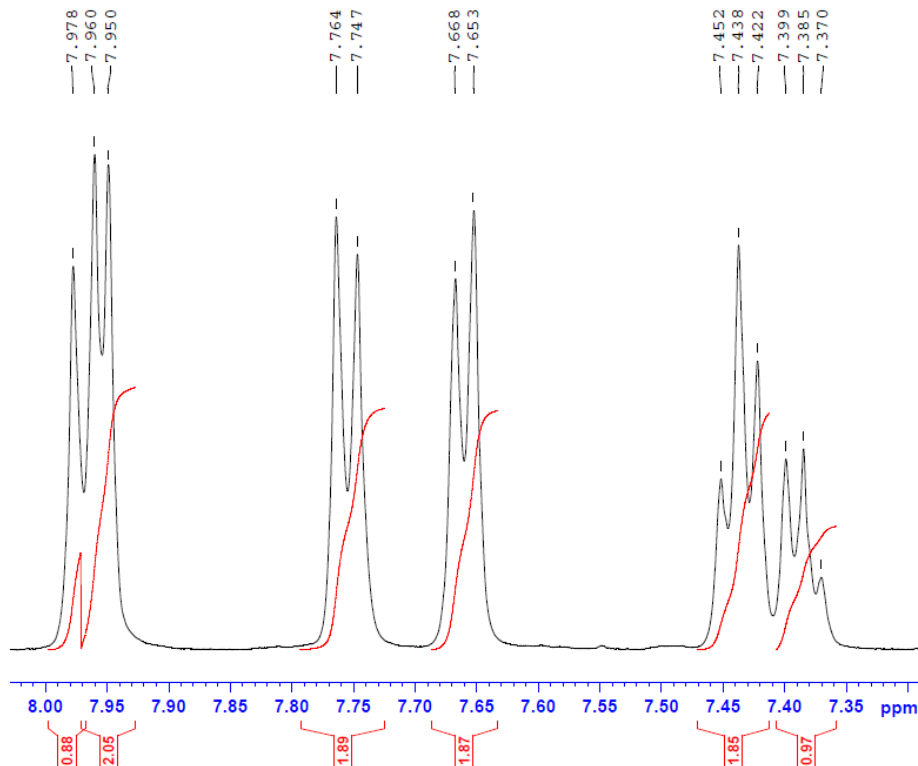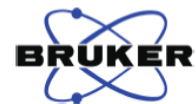

Current Data Parameters  
 NAME Bhadra  
 EXPNO 408  
 PROCNO 1

F2 - Acquisition Parameters  
 Date\_ 20140507  
 Time 11.04  
 INSTRUM spect  
 PROBHD 5 mm PABBO BB/  
 PULPROG zg30  
 TD 65536  
 SOLVENT DMSO  
 NS 32  
 DS 2  
 SWH 10000.000 Hz  
 FIDRES 0.152588 Hz  
 AQ 3.2767999 sec  
 RG 32.16  
 DW 50.000 usec  
 DE 6.50 usec  
 TE 296.3 K  
 D1 1.00000000 sec  
 TD0 1

===== CHANNEL f1 =====  
 SF01 500.0930883 MHz  
 NUC1 1H  
 P1 12.15 usec  
 PLW1 17.00000000 W

F2 - Processing parameters  
 SI 65536  
 SF 500.0900000 MHz  
 WDW EM  
 SSB 0  
 LB 0.30 Hz  
 GB 0  
 PC 1.00

### <sup>13</sup>C NMR Spectrum of stilbene (4) in acidic medium

nmme, cn, acidic, no oh

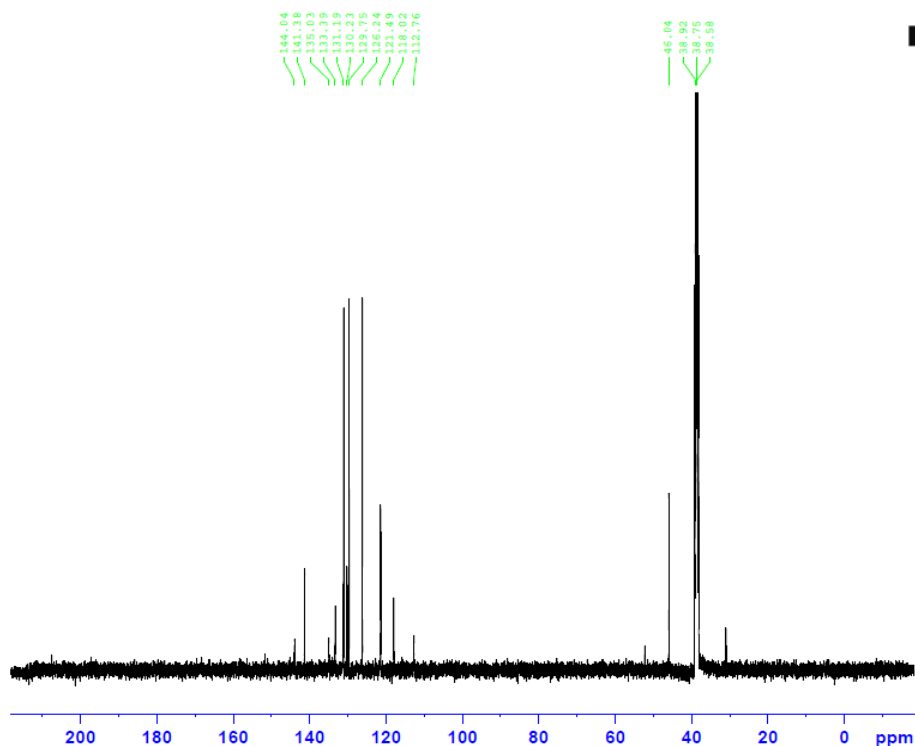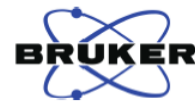

Current Data Parameters  
 NAME Bhadra  
 EXPNO 409  
 PROCNO 1

F2 - Acquisition Parameters  
 Date\_ 20140507  
 Time 12.55  
 INSTRUM spect  
 PROBHD 5 mm PABBO BB/  
 PULPROG zgpg30  
 TD 65536  
 SOLVENT DMSO  
 NS 2000  
 DS 4  
 SWH 29761.904 Hz  
 FIDRES 0.454131 Hz  
 AQ 1.1010048 sec  
 RG 112.97  
 DW 16.800 usec  
 DE 6.50 usec  
 TE 299.0 K  
 D1 2.00000000 sec  
 D11 0.03000000 sec  
 TD0 1

===== CHANNEL f1 =====  
 SF01 125.7603047 MHz  
 NUC1 13C  
 P1 8.90 usec  
 PLW1 29.00000000 W

===== CHANNEL f2 =====  
 SF02 500.0920004 MHz  
 NUC2 1H  
 CPDPRG[2] waltz16  
 PCPD2 80.00 usec  
 PLW2 17.00000000 W  
 PLW12 0.52061999 W  
 PLW13 0.33320001 W

F2 - Processing parameters  
 SI 32768  
 SF 125.7477310 MHz  
 WDW EM  
 SSB 0  
 LB 1.00 Hz  
 GB 0  
 PC 1.40

# <sup>1</sup>H NMR Spectrum of stilbene (5)

diphenyl, cn, stil, no oh

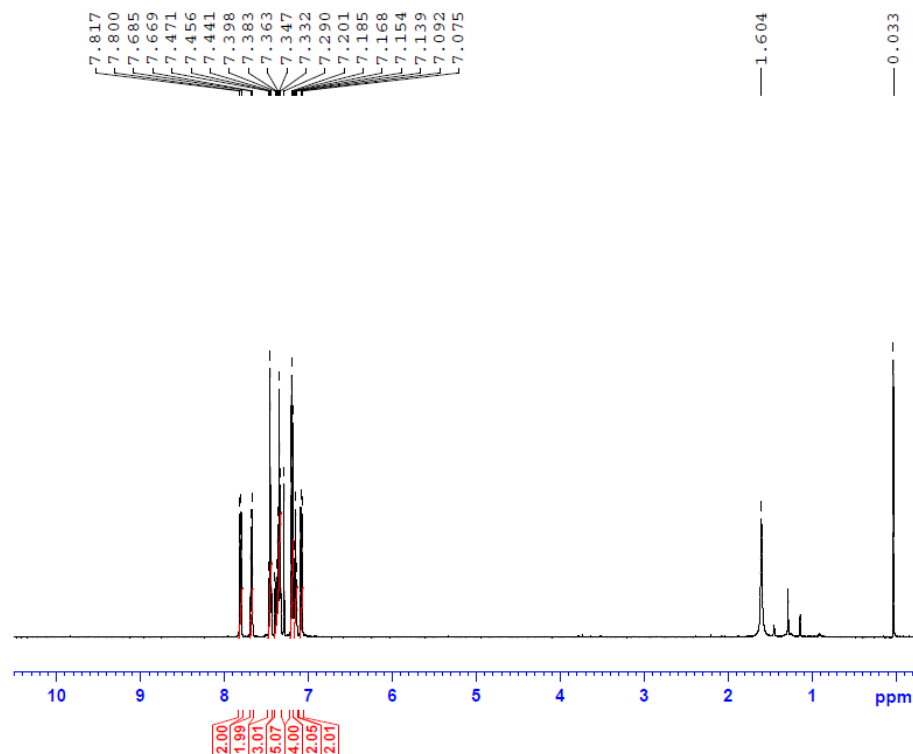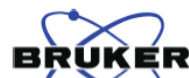

Current Data Parameters  
 NAME Bhadra  
 EXPNO 182  
 PROCNO 1

F2 - Acquisition Parameters  
 Date\_ 20131207  
 Time 11.56  
 INSTRUM spect  
 PROBHD 5 mm PABBO BB/  
 PULPROG zg30  
 TD 65536  
 SOLVENT CDCl3  
 NS 32  
 DS 2  
 SWH 10000.000 Hz  
 FIDRES 0.152588 Hz  
 AQ 3.2767999 sec  
 RG 200.08  
 DW 50.000 usec  
 DE 6.50 usec  
 TE 297.5 K  
 D1 1.00000000 sec  
 TDO 1

==== CHANNEL f1 =====  
 SF01 500.0930883 MHz  
 NUC1 1H  
 P1 12.15 usec  
 PLW1 17.00000000 W

F2 - Processing parameters  
 SI 65536  
 SF 500.0900000 MHz  
 WDW EM  
 SSB 0  
 LB 0.30 Hz  
 GB 0  
 PC 1.00

diphenyl, cn, stil, no oh

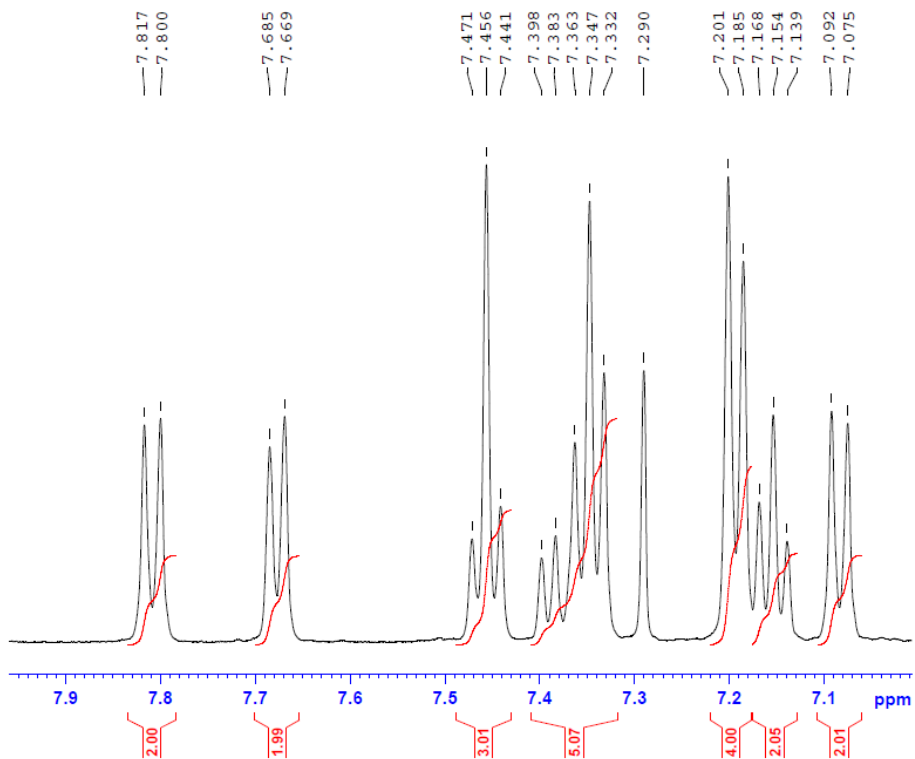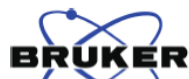

Current Data Parameters  
 NAME Bhadra  
 EXPNO 182  
 PROCNO 1

F2 - Acquisition Parameters  
 Date\_ 20131207  
 Time 11.56  
 INSTRUM spect  
 PROBHD 5 mm PABBO BB/  
 PULPROG zg30  
 TD 65536  
 SOLVENT CDCl3  
 NS 32  
 DS 2  
 SWH 10000.000 Hz  
 FIDRES 0.152588 Hz  
 AQ 3.2767999 sec  
 RG 200.08  
 DW 50.000 usec  
 DE 6.50 usec  
 TE 297.5 K  
 D1 1.00000000 sec  
 TDO 1

==== CHANNEL f1 =====  
 SF01 500.0930883 MHz  
 NUC1 1H  
 P1 12.15 usec  
 PLW1 17.00000000 W

F2 - Processing parameters  
 SI 65536  
 SF 500.0900000 MHz  
 WDW EM  
 SSB 0  
 LB 0.30 Hz  
 GB 0  
 PC 1.00

### <sup>13</sup>C NMR Spectrum of stilbene (5)

diphenyl, cn, stil, no oh

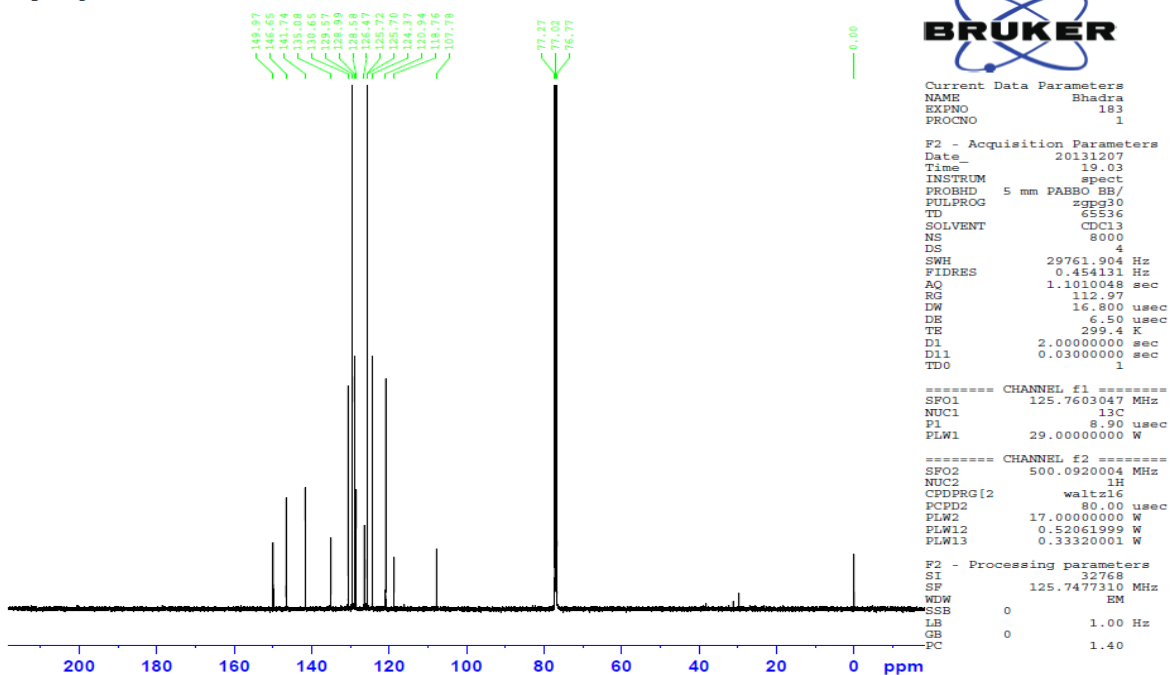

### <sup>1</sup>H NMR Spectrum of stilbene (6)

carbazole, no oh

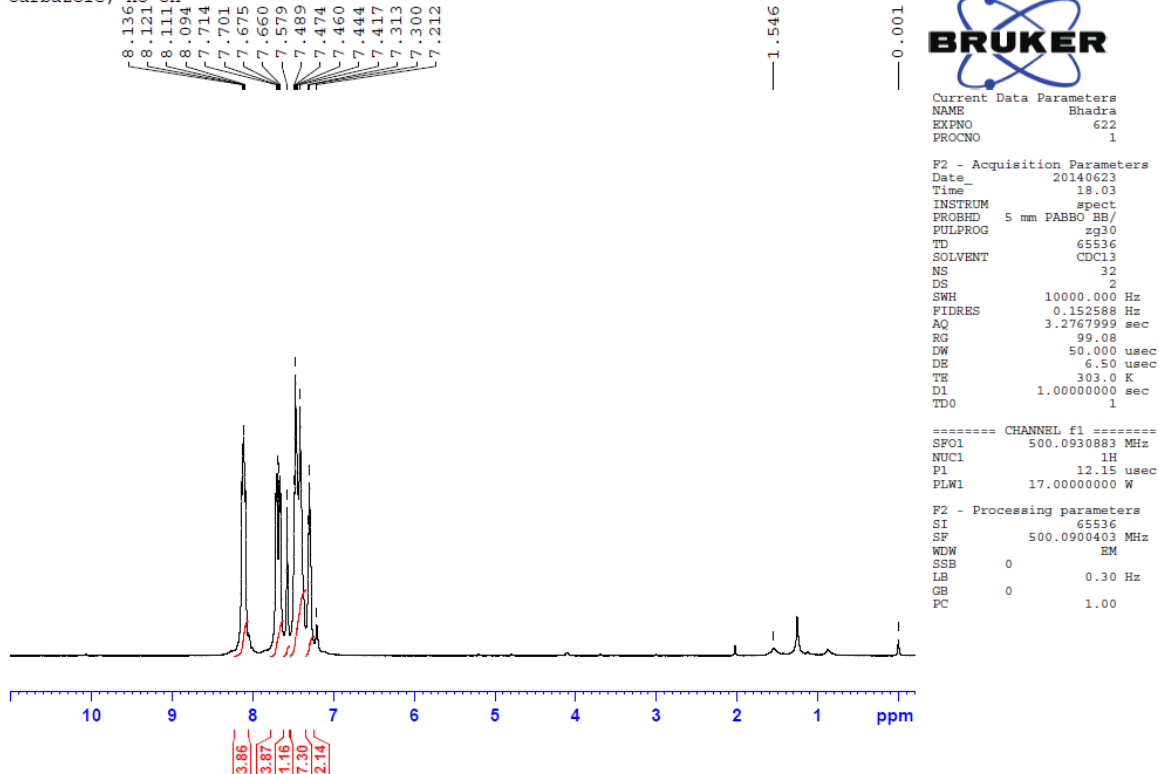

carbazole, no oh

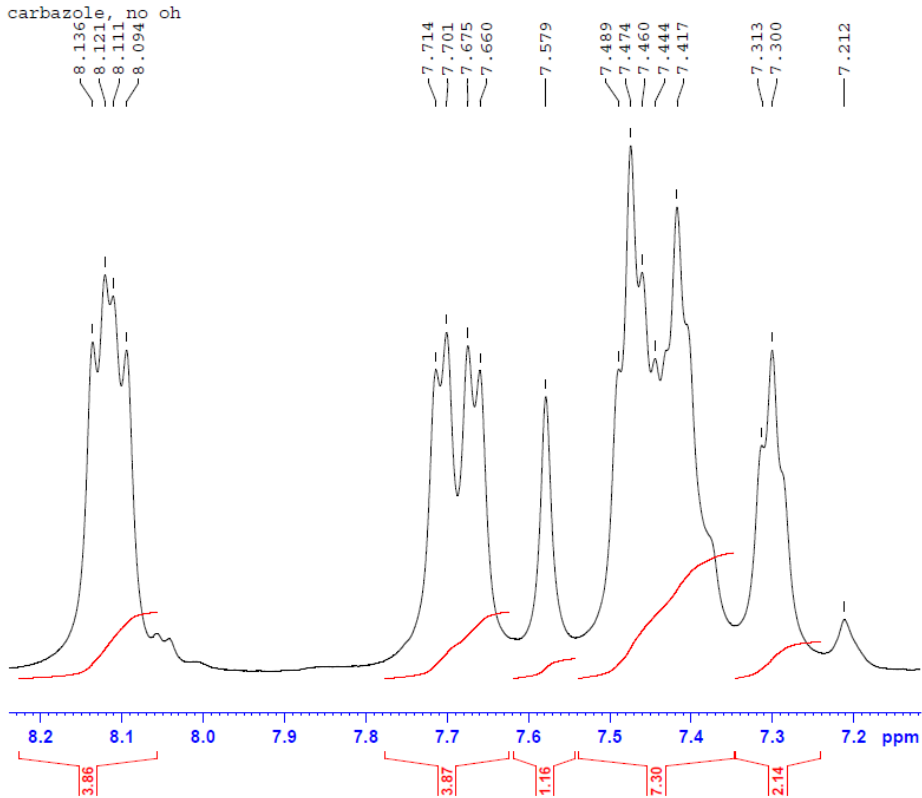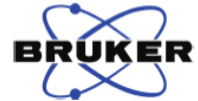

Current Data Parameters  
 NAME Bhadra  
 EXPNO 622  
 PROCNO 1

F2 - Acquisition Parameters  
 Date\_ 20140623  
 Time 19.03  
 INSTRUM spect  
 PROBHD 5 mm PABBO BB/  
 PULPROG zg30  
 TD 65536  
 SOLVENT CDCl3  
 NS 32  
 DS 2  
 SWH 10000.000 Hz  
 FIDRES 0.152588 Hz  
 AQ 3.2767999 sec  
 RG 99.08  
 DW 50.000 usec  
 DE 6.50 usec  
 TE 303.0 K  
 D1 1.00000000 sec  
 TDO 1

===== CHANNEL f1 =====  
 SFO1 500.0930883 MHz  
 NUC1 1H  
 P1 12.15 usec  
 PLW1 17.00000000 W

F2 - Processing parameters  
 SI 65536  
 SF 500.0900403 MHz  
 WDW EM  
 SSB 0  
 LB 0.30 Hz  
 GB 0  
 PC 1.00

### <sup>13</sup>CNMR Spectrum of stilbene (6)

carbazole, no oh

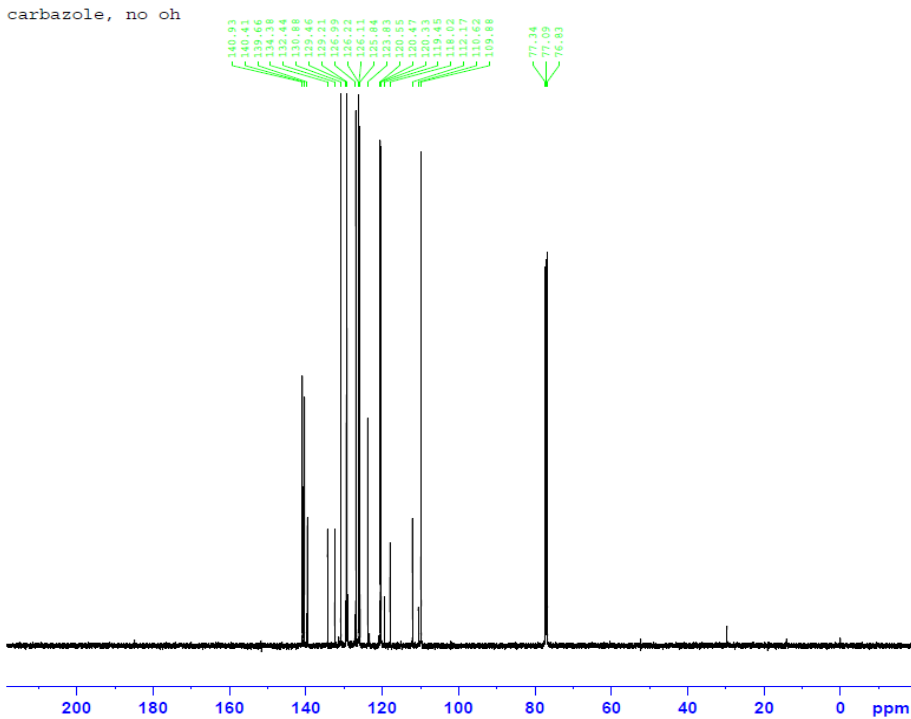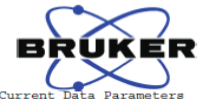

Current Data Parameters  
 NAME Bhadra  
 EXPNO 623  
 PROCNO 1

F2 - Acquisition Parameters  
 Date\_ 20140623  
 Time 19.03  
 INSTRUM spect  
 PROBHD 5 mm PABBO BB/  
 PULPROG zgpg30  
 TD 65536  
 SOLVENT CDCl3  
 NS 1024  
 DS 4  
 SWH 29761.904 Hz  
 FIDRES 0.454131 Hz  
 AQ 1.1010048 sec  
 RG 200.08  
 DW 16.800 usec  
 DE 6.50 usec  
 TE 304.2 K  
 D1 2.00000000 sec  
 D11 0.03000000 sec  
 TDO 1

===== CHANNEL f1 =====  
 SFO1 125.7603047 MHz  
 NUC1 13C  
 P1 8.90 usec  
 PLW1 29.00000000 W

===== CHANNEL f2 =====  
 SFO2 500.0920004 MHz  
 NUC2 1H  
 CPDPRG2 waltz16  
 PCPD2 80.00 usec  
 PLW2 17.00000000 W  
 PLW12 0.52061999 W  
 PLW13 0.33320001 W

F2 - Processing parameters  
 SI 32768  
 SF 125.7477310 MHz  
 WDW EM  
 SSB 0  
 LB 1.00 Hz  
 GB 0  
 PC 1.40
